# Supplementary material for: Particles under stress: ultrasonication causes size and recovery rate artifacts with soil-derived POM but not with microplastics
Source: Copernicus journal article supplement (doi:10.5194/bg-18-159-2021), 2021-01-11
Supplement: Supplementary file 1 [file bg-18-159-2021-supplement.zip]

Archive with 2 entries (2 files):
- Supplements (final).ods
- bg-18-159-2021-supplement-title-page.pdf
