# Supplementary material for: Particles under stress: ultrasonication causes size and recovery rate artifacts with soil-derived POM but not with microplastics
Source: Copernicus journal article supplement (doi:10.5194/bg-18-159-2021), 2021-01-11
Supplement: Supplementary file 1 [file bg-18-159-2021-supplement.zip › bg-18-159-2021-supplement-title-page.pdf]

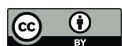

## *Supplement of*

# **Particles under stress: ultrasonication causes size and recovery rate artifacts with soil-derived POM but not with microplastics**

**Frederick Büks et al.**

*Correspondence to:* Frederick Büks ([frederick.bueks@tu-berlin.de](mailto:frederick.bueks@tu-berlin.de))

- [bg-18-159-2021-supplement-title-page.pdf](#)
- [Supplements \(final\).ods](#)

The copyright of individual parts of the supplement might differ from the CC BY 4.0 License.
