# Supplementary material for: Particles under stress: ultrasonication causes size and recovery rate artifacts with soil-derived POM but not with microplastics
Source: Copernicus journal article supplement (doi:10.5194/bg-18-159-2021), 2021-01-11
Supplement: Supplementary file 1 [file bg-18-159-2021-supplement.zip › Supplements (final).ods]

## Sheet: Primary marking
		Primary marking (data based on oven-dry mass)
		site	coordinates	use	soil texture	pH	Ctot	Cmin	Corg	WHC
							[g/kg]	[g/kg]	[g/kg]	[ml/g]
		farmland	52°46’54’’N, 13°11’50’’E	organic horticulture	Ss	5.8	49.3	0.00	49.3	0.81
		forest	47°50'59’’N, 9°41'30’’E	spruce/beech mixed forest	Sl4	3.4	73.2	0.00	73.2	0.99

## Sheet: Energy input
		Calculation of the ultrasonication sequences												Frederick Büks, 2019:
		Solution for density separation (DSS):					1.60	[g/cm3]	← in case of water 1.0, in case of SPT solution variable between 1.0 and 3.1 g/cm³ [Six et al., 1999]
		Soil solution:					1.00	[g/cm3]	← assumed to be 1.0 g/cm³
		Soil matrix					2.65	[g/cm3]	← assumed for solid matrices mainly containing silicates
		sample	date	sonication power	SD +/-	flask	soil weight (air-dry)	soil solution (pre-incub.)	flask + soil weight	flask + soil weight + soil solution + DSS	DSS	volume: soil solution + DSS	volume: soil	volume: soil + soil solution + DSS	energy level	total energy	sonication sequence
				[W]=[J/s]	[W]=[J/s]	[g]	[g]	[g]	[g]	[g]	[g]	[ml]=[cm3]	[ml]	[ml]	[J/ml]	[J]	[s]	[min,s]
		farm-oLF 0 A	06/12/19	52.0579	1.6723	22.32	20.00	0.00	42.32	201.98	159.66	99.79	7.55	107.33	0	0.0	0	0.00
		farm-oLF 0 B	06/12/19	52.0579	1.6723	22.13	20.00	0.00	42.13	201.71	159.58	99.74	7.55	107.28	0	0.0	0	0.00
		farm-oLF 0 C	06/12/19	52.0579	1.6723	24.10	20.00	0.00	44.10	203.81	159.71	99.82	7.55	107.37	0	0.0	0	0.00
		farm-oLF 10 A	06/17/19	52.0579	1.6723	24.84	20.00	0.00	44.84	202.71	157.87	98.67	7.55	106.22	10	1062.2	20	0.20
		farm-oLF 10 B	06/17/19	52.0579	1.6723	22.68	20.00	0.00	42.68	195.43	152.75	95.47	7.55	103.02	10	1030.2	20	0.20
		farm-oLF 10 C	06/17/19	52.0579	1.6723	22.60	20.00	0.00	42.60	182.21	139.61	87.26	7.55	94.80	10	948.0	18	0.18
		farm-oLF 50 A	06/17/19	52.0579	1.6723	23.94	20.00	0.00	43.94	191.58	147.64	92.28	7.55	99.82	50	4991.1	96	1.36
		farm-oLF 50 B	06/17/19	52.0579	1.6723	24.51	20.00	0.00	44.51	190.71	146.20	91.38	7.55	98.92	50	4946.1	95	1.35
		farm-oLF 50 C	06/17/19	52.0579	1.6723	22.83	20.00	0.00	42.83	202.05	159.22	99.51	7.55	107.06	50	5353.0	103	1.43
		farm-oLF 100 A	06/17/19	52.0579	1.6723	23.92	20.00	0.00	43.92	197.27	153.35	95.84	7.55	103.39	100	10339.1	199	3.19
		farm-oLF 100 B	06/17/19	52.0579	1.6723	24.01	20.00	0.00	44.01	196.35	152.34	95.21	7.55	102.76	100	10276.0	197	3.17
		farm-oLF 100 C	06/17/19	52.0579	1.6723	22.80	20.00	0.00	42.80	194.96	152.16	95.10	7.55	102.65	100	10264.7	197	3.17
		farm-oLF 500 A	10/22/19	52.0579	1.6723	22.86	20.00	0.00	42.86	202.64	159.78	99.86	7.55	107.41	500	53704.8	1032	17.12
		farm-oLF 500 B	10/22/19	52.0579	1.6723	22.26	20.00	0.00	42.26	202.63	160.37	100.23	7.55	107.78	500	53889.2	1035	17.15
		farm-oLF 500 C	10/22/19	52.0579	1.6723	24.00	20.00	0.00	44.00	204.22	160.22	100.14	7.55	107.68	500	53842.3	1034	17.14
		forest-oLF 0 A	06/13/19	52.0579	1.6723	22.64	20.00	0.00	42.64	202.21	159.57	99.73	7.55	107.28	0	0.0	0	0.00
		forest-oLF 0 B	06/13/19	52.0579	1.6723	23.87	20.00	0.00	43.87	203.56	159.69	99.81	7.55	107.35	0	0.0	0	0.00
		forest-oLF 0 C	06/13/19	52.0579	1.6723	22.14	20.00	0.00	42.14	201.81	159.67	99.79	7.55	107.34	0	0.0	0	0.00
		forest-oLF 10 A	06/13/19	52.0579	1.6723	24.02	20.00	0.00	44.02	200.70	156.68	97.93	7.55	105.47	10	1054.7	20	0.20
		forest-oLF 10 B	06/13/19	52.0579	1.6723	24.07	20.00	0.00	44.07	200.97	156.90	98.06	7.55	105.61	10	1056.1	20	0.20
		forest-oLF 10 C	06/13/19	52.0579	1.6723	22.95	20.00	0.00	42.95	202.22	159.27	99.54	7.55	107.09	10	1070.9	21	0.21
		forest-oLF 50 A	06/21/19	52.0579	1.6723	24.14	20.00	0.00	44.14	202.75	158.61	99.13	7.55	106.68	50	5333.9	102	1.42
		forest-oLF 50 B	06/21/19	52.0579	1.6723	22.50	20.00	0.00	42.50	201.49	158.99	99.37	7.55	106.92	50	5345.8	103	1.43
		forest-oLF 50 C	06/21/19	52.0579	1.6723	23.95	20.00	0.00	43.95	202.95	159.00	99.38	7.55	106.92	50	5346.1	103	1.43
		forest-oLF 100 A	06/21/19	52.0579	1.6723	24.86	20.00	0.00	44.86	203.78	158.92	99.33	7.55	106.87	100	10687.2	205	3.25
		forest-oLF 100 B	06/21/19	52.0579	1.6723	22.02	20.00	0.00	42.02	201.14	159.12	99.45	7.55	107.00	100	10699.7	206	3.26
		forest-oLF 100 C	06/21/19	52.0579	1.6723	24.22	20.00	0.00	44.22	203.16	158.94	99.34	7.55	106.88	100	10688.5	205	3.25
		forest-oLF 500 A	06/21/19	52.0579	1.6723	22.58	20.00	0.00	42.58	201.59	159.01	99.38	7.55	106.93	500	53464.2	1027	17.07
		forest-oLF 500 B	06/21/19	52.0579	1.6723	23.86	20.00	0.00	43.86	203.14	159.28	99.55	7.55	107.10	500	53548.6	1029	17.09
		forest-oLF 500 C	06/21/19	52.0579	1.6723	24.20	20.00	0.00	44.20	202.27	158.07	98.79	7.55	106.34	500	53170.5	1021	17.01
		pyrochar 0 A	10/15/19	52.0579	1.6723	25.02	20.00	0.00	45.02	207.74	162.72	101.70	7.55	109.25	0	0.0	0	0.00
		pyrochar 0 B	10/15/19	52.0579	1.6723	24.18	20.00	0.00	44.18	205.09	160.91	100.57	7.55	108.12	0	0.0	0	0.00
		pyrochar 0 C	10/15/19	52.0579	1.6723	24.44	20.00	0.00	44.44	206.16	161.72	101.08	7.55	108.62	0	0.0	0	0.00
		pyrochar 10 A	10/11/19	52.0579	1.6723	24.85	20.00	0.00	44.85	204.13	159.28	99.55	7.55	107.10	10	1071.0	21	0.21
		pyrochar 10 B	10/11/19	52.0579	1.6723	24.89	20.00	0.00	44.89	203.13	158.24	98.90	7.55	106.45	10	1064.5	20	0.20
		pyrochar 10 C	10/11/19	52.0579	1.6723	23.64	20.00	0.00	43.64	202.84	159.20	99.50	7.55	107.05	10	1070.5	21	0.21
		pyrochar 50 A	10/11/19	52.0579	1.6723	23.31	20.00	0.00	43.31	192.40	149.09	93.18	7.55	100.73	50	5036.4	97	1.37
		pyrochar 50 B	10/11/19	52.0579	1.6723	22.66	20.00	0.00	42.66	201.72	159.06	99.41	7.55	106.96	50	5348.0	103	1.43
		pyrochar 50 C	10/11/19	52.0579	1.6723	22.63	20.00	0.00	42.63	201.67	159.04	99.40	7.55	106.95	50	5347.4	103	1.43
		pyrochar 100 A	10/11/19	52.0579	1.6723	22.23	20.00	0.00	42.23	201.77	159.54	99.71	7.55	107.26	100	10726.0	206	3.26
		pyrochar 100 B	10/11/19	52.0579	1.6723	23.19	20.00	0.00	43.19	201.33	158.14	98.84	7.55	106.38	100	10638.5	204	3.24
		pyrochar 100 C	10/11/19	52.0579	1.6723	22.10	20.00	0.00	42.10	197.31	155.21	97.01	7.55	104.55	100	10455.3	201	3.21
		pyrochar 500 A	10/11/19	52.0579	1.6723	22.75	20.00	0.00	42.75	201.96	159.21	99.51	7.55	107.05	500	53526.7	1028	17.08
		pyrochar 500 B	10/11/19	52.0579	1.6723	22.34	20.00	0.00	42.34	203.19	160.85	100.53	7.55	108.08	500	54039.2	1038	17.18
		pyrochar 500 C	10/11/19	52.0579	1.6723	22.21	20.00	0.00	42.21	201.22	159.01	99.38	7.55	106.93	500	53464.2	1027	17.07
		LDPE 0 A	06/06/19	52.0579	1.6723	22.18	20.00	0.00	42.18	201.44	159.26	99.54	7.55	107.08	0	0.0	0	0.00
		LDPE 0 B	06/06/19	52.0579	1.6723	22.64	20.00	0.00	42.64	203.08	160.44	100.28	7.55	107.82	0	0.0	0	0.00
		LDPE 0 C	06/06/19	52.0579	1.6723	22.86	20.00	0.00	42.86	203.26	160.40	100.25	7.55	107.80	0	0.0	0	0.00
		LDPE 10 A	06/06/19	52.0579	1.6723	24.83	20.00	0.00	44.83	205.22	160.39	100.24	7.55	107.79	10	1077.9	21	0.21
		LDPE 10 B	06/06/19	52.0579	1.6723	22.64	20.00	0.00	42.64	202.69	160.05	100.03	7.55	107.58	10	1075.8	21	0.21
		LDPE 10 C	06/06/19	52.0579	1.6723	24.95	20.00	0.00	44.95	204.92	159.97	99.98	7.55	107.53	10	1075.3	21	0.21
		LDPE 50 A	06/06/19	52.0579	1.6723	22.16	20.00	0.00	42.16	202.55	160.39	100.24	7.55	107.79	50	5389.5	104	1.44
		LDPE 50 B	06/06/19	52.0579	1.6723	23.74	20.00	0.00	43.74	203.64	159.90	99.94	7.55	107.48	50	5374.2	103	1.43
		LDPE 50 C	06/06/19	52.0579	1.6723	22.77	20.00	0.00	42.77	202.76	159.99	99.99	7.55	107.54	50	5377.0	103	1.43
		LDPE 100 A	06/06/19	52.0579	1.6723	23.01	20.00	0.00	43.01	203.25	160.24	100.15	7.55	107.70	100	10769.7	207	3.27
		LDPE 100 B	06/06/19	52.0579	1.6723	22.42	20.00	0.00	42.42	202.56	160.14	100.09	7.55	107.63	100	10763.5	207	3.27
		LDPE 100 C	06/06/19	52.0579	1.6723	23.87	20.00	0.00	43.87	203.99	160.12	100.08	7.55	107.62	100	10762.2	207	3.27
		LDPE 500 A	06/05/19	52.0579	1.6723	23.63	20.00	0.00	43.63	203.91	160.28	100.18	7.55	107.72	500	53861.1	1035	17.15
		LDPE 500 B	06/05/19	52.0579	1.6723	25.06	20.00	0.00	45.06	205.22	160.16	100.10	7.55	107.65	500	53823.6	1034	17.14
		LDPE 500 C	06/05/19	52.0579	1.6723	22.60	20.00	0.00	42.60	203.29	160.69	100.43	7.55	107.98	500	53989.2	1037	17.17
		LDPE-w 0 A	06/05/19	52.0579	1.6723	25.10	20.00	0.00	45.10	205.37	160.27	100.17	7.55	107.72	0	0.0	0	0.00
		LDPE-w 0 B	06/05/19	52.0579	1.6723	22.22	20.00	0.00	42.22	196.44	154.22	96.39	7.55	103.93	0	0.0	0	0.00
		LDPE-w 0 C	06/05/19	52.0579	1.6723	25.01	20.00	0.00	45.01	205.22	160.21	100.13	7.55	107.68	0	0.0	0	0.00
		LDPE-w 10 A	06/05/19	52.0579	1.6723	23.02	20.00	0.00	43.02	201.35	158.33	98.96	7.55	106.50	10	1065.0	20	0.20
		LDPE-w 10 B	06/05/19	52.0579	1.6723	22.66	20.00	0.00	42.66	203.05	160.39	100.24	7.55	107.79	10	1077.9	21	0.21
		LDPE-w 10 C	06/05/19	52.0579	1.6723	22.72	20.00	0.00	42.72	203.06	160.34	100.21	7.55	107.76	10	1077.6	21	0.21
		LDPE-w 50 A	06/05/19	52.0579	1.6723	22.73	20.00	0.00	42.73	203.05	160.32	100.20	7.55	107.75	50	5387.4	103	1.43
		LDPE-w 50 B	06/05/19	52.0579	1.6723	24.75	20.00	0.00	44.75	204.98	160.23	100.14	7.55	107.69	50	5384.5	103	1.43
		LDPE-w 50 C	06/05/19	52.0579	1.6723	24.80	20.00	0.00	44.80	205.19	160.39	100.24	7.55	107.79	50	5389.5	104	1.44
		LDPE-w 100 A	06/05/19	52.0579	1.6723	23.25	20.00	0.00	43.25	203.68	160.43	100.27	7.55	107.82	100	10781.6	207	3.27
		LDPE-w 100 B	06/05/19	52.0579	1.6723	24.96	20.00	0.00	44.96	205.53	160.57	100.36	7.55	107.90	100	10790.3	207	3.27
		LDPE-w 100 C	06/05/19	52.0579	1.6723	22.53	20.00	0.00	42.53	203.02	160.49	100.31	7.55	107.85	100	10785.3	207	3.27
		LDPE-w 500 A	06/05/19	52.0579	1.6723	22.16	20.00	0.00	42.16	202.86	160.70	100.44	7.55	107.98	500	53992.3	1037	17.17
		LDPE-w 500 B	06/05/19	52.0579	1.6723	23.97	20.00	0.00	43.97	213.92	169.95	106.22	7.55	113.77	500	56883.0	1093	18.13
		LDPE-w 500 C	06/05/19	52.0579	1.6723	22.14	20.00	0.00	42.14	202.45	160.31	100.19	7.55	107.74	500	53870.5	1035	17.15
		PET 0 A	10/10/19	52.0579	1.6723	22.68	20.00	0.00	42.68	194.20	151.52	94.70	7.55	102.25	0	0.0	0	0.00
		PET 0 B	10/10/19	52.0579	1.6723	23.30	20.00	0.00	43.30	196.18	152.88	95.55	7.55	103.10	0	0.0	0	0.00
		PET 0 C	10/10/19	52.0579	1.6723	24.86	20.00	0.00	44.86	207.53	162.67	101.67	7.55	109.22	0	0.0	0	0.00
		PET 10 A	10/07/19	52.0579	1.6723	23.00	20.00	0.00	43.00	201.51	158.51	99.07	7.55	106.62	10	1066.2	20	0.20
		PET 10 B	10/07/19	52.0579	1.6723	22.66	20.00	0.00	42.66	202.35	159.69	99.81	7.55	107.35	10	1073.5	21	0.21
		PET 10 C	10/07/19	52.0579	1.6723	22.10	20.00	0.00	42.10	201.46	159.36	99.60	7.55	107.15	10	1071.5	21	0.21
		PET 50 A	10/07/19	52.0579	1.6723	22.08	20.00	0.00	42.08	199.63	157.55	98.47	7.55	106.02	50	5300.8	102	1.42
		PET 50 B	10/07/19	52.0579	1.6723	23.72	20.00	0.00	43.72	202.02	158.30	98.94	7.55	106.48	50	5324.2	102	1.42
		PET 50 C	10/07/19	52.0579	1.6723	23.52	20.00	0.00	43.52	203.14	159.62	99.76	7.55	107.31	50	5365.5	103	1.43
		PET 100 A	10/10/19	52.0579	1.6723	22.41	20.00	0.00	42.41	194.95	152.54	95.34	7.55	102.88	100	10288.5	198	3.18
		PET 100 B	10/10/19	52.0579	1.6723	22.94	20.00	0.00	42.94	196.13	153.19	95.74	7.55	103.29	100	10329.1	198	3.18
		PET 100 C	10/10/19	52.0579	1.6723	23.32	20.00	0.00	43.32	202.16	158.84	99.28	7.55	106.82	100	10682.2	205	3.25
		PET 500 A	10/10/19	52.0579	1.6723	24.93	20.00	0.00	44.93	204.61	159.68	99.80	7.55	107.35	500	53673.6	1031	17.11
		PET 500 B	10/10/19	52.0579	1.6723	23.56	20.00	0.00	43.56	203.01	159.45	99.66	7.55	107.20	500	53601.7	1030	17.10
		PET 500 C	10/10/19	52.0579	1.6723	23.55	20.00	0.00	43.55	203.05	159.50	99.69	7.55	107.23	500	53617.3	1030	17.10
		PET-w 0 A	10/22/19	52.0579	1.6723	24.96	20.00	0.00	44.96	197.50	152.54	95.34	7.55	102.88	0	0.0	0	0.00
		PET-w 0 B	10/22/19	52.0579	1.6723	22.80	20.00	0.00	42.80	195.99	153.19	95.74	7.55	103.29	0	0.0	0	0.00
		PET-w 0 C	10/22/19	52.0579	1.6723	23.13	20.00	0.00	43.13	201.97	158.84	99.28	7.55	106.82	0	0.0	0	0.00
		PET-w 10 A	10/18/19	52.0579	1.6723	21.94	20.00	0.00	41.94	201.73	159.79	99.87	7.55	107.42	10	1074.2	21	0.21
		PET-w 10 B	10/18/19	52.0579	1.6723	22.76	20.00	0.00	42.76	202.31	159.55	99.72	7.55	107.27	10	1072.7	21	0.21
		PET-w 10 C	10/18/19	52.0579	1.6723	22.36	20.00	0.00	42.36	201.83	159.47	99.67	7.55	107.22	10	1072.2	21	0.21
		PET-w 50 A	10/18/19	52.0579	1.6723	23.20	20.00	0.00	43.20	201.91	158.71	99.19	7.55	106.74	50	5337.0	103	1.43
		PET-w 50 B	10/18/19	52.0579	1.6723	22.72	20.00	0.00	42.72	201.86	159.14	99.46	7.55	107.01	50	5350.5	103	1.43
		PET-w 50 C	10/18/19	52.0579	1.6723	22.64	20.00	0.00	42.64	202.53	159.89	99.93	7.55	107.48	50	5373.9	103	1.43
		PET-w 100 A	10/18/19	52.0579	1.6723	23.86	20.00	0.00	43.86	202.18	158.32	98.95	7.55	106.50	100	10649.7	205	3.25
		PET-w 100 B	10/18/19	52.0579	1.6723	24.85	20.00	0.00	44.85	204.66	159.81	99.88	7.55	107.43	100	10742.8	206	3.26
		PET-w 100 C	10/18/19	52.0579	1.6723	22.65	20.00	0.00	42.65	203.41	160.76	100.48	7.55	108.02	100	10802.2	208	3.28
		PET-w 500 A	10/15/19	52.0579	1.6723	22.95	20.00	0.00	42.95	202.36	159.41	99.63	7.55	107.18	500	53589.2	1029	17.09
		PET-w 500 B	10/15/19	52.0579	1.6723	24.39	20.00	0.00	44.39	204.32	159.93	99.96	7.55	107.50	500	53751.7	1033	17.13
		PET-w 500 C	10/15/19	52.0579	1.6723	23.04	20.00	0.00	43.04	202.95	159.91	99.94	7.55	107.49	500	53745.5	1032	17.12
		PBAT 0 A	10/10/19	52.0579	1.6723	22.30	20.00	0.00	42.30	203.65	161.35	100.84	7.55	108.39	0	0.0	0	0.00
		PBAT 0 B	10/10/19	52.0579	1.6723	23.69	20.00	0.00	43.69	207.94	164.25	102.66	7.55	110.20	0	0.0	0	0.00
		PBAT 0 C	10/10/19	52.0579	1.6723	23.54	20.00	0.00	43.54	207.79	164.25	102.66	7.55	110.20	0	0.0	0	0.00
		PBAT 10 A	10/08/19	52.0579	1.6723	23.15	20.00	0.00	43.15	185.64	142.49	89.06	7.55	96.60	10	966.0	19	0.19
		PBAT 10 B	10/08/19	52.0579	1.6723	22.68	20.00	0.00	42.68	194.01	151.33	94.58	7.55	102.13	10	1021.3	20	0.20
		PBAT 10 C	10/08/19	52.0579	1.6723	22.98	20.00	0.00	42.98	202.32	159.34	99.59	7.55	107.13	10	1071.3	21	0.21
		PBAT 50 A	10/08/19	52.0579	1.6723	22.71	20.00	0.00	42.71	194.51	151.80	94.88	7.55	102.42	50	5121.1	98	1.38
		PBAT 50 B	10/08/19	52.0579	1.6723	24.89	20.00	0.00	44.89	204.42	159.53	99.71	7.55	107.25	50	5362.7	103	1.43
		PBAT 50 C	10/08/19	52.0579	1.6723	22.05	20.00	0.00	42.05	201.60	159.55	99.72	7.55	107.27	50	5363.3	103	1.43
		PBAT 100 A	10/10/19	52.0579	1.6723	24.23	20.00	0.00	44.23	208.39	164.16	102.60	7.55	110.15	100	11014.7	212	3.32
		PBAT 100 B	10/10/19	52.0579	1.6723	24.79	20.00	0.00	44.79	203.51	158.72	99.20	7.55	106.75	100	10674.7	205	3.25
		PBAT 100 C	10/10/19	52.0579	1.6723	22.80	20.00	0.00	42.80	201.56	158.76	99.23	7.55	106.77	100	10677.2	205	3.25
		PBAT 500 A	10/10/19	52.0579	1.6723	24.89	20.00	0.00	44.89	204.33	159.44	99.65	7.55	107.20	500	53598.6	1030	17.10
		PBAT 500 B	10/10/19	52.0579	1.6723	24.78	20.00	0.00	44.78	204.10	159.32	99.58	7.55	107.12	500	53561.1	1029	17.09
		PBAT 500 C	10/10/19	52.0579	1.6723	22.32	20.00	0.00	42.32	201.74	159.42	99.64	7.55	107.18	500	53592.3	1029	17.09
		PBAT-w 0 A	10/15/19	52.0579	1.6723	24.88	20.00	0.00	44.88	206.50	161.62	101.01	7.55	108.56	0	0.0	0	0.00
		PBAT-w 0 B	10/15/19	52.0579	1.6723	23.35	20.00	0.00	43.35	205.58	162.23	101.39	7.55	108.94	0	0.0	0	0.00
		PBAT-w 0 C	10/15/19	52.0579	1.6723	23.06	20.00	0.00	43.06	206.12	163.06	101.91	7.55	109.46	0	0.0	0	0.00
		PBAT-w 10 A	10/18/19	52.0579	1.6723	23.92	20.00	0.00	43.92	187.70	143.78	89.86	7.55	97.41	10	974.1	19	0.19
		PBAT-w 10 B	10/18/19	52.0579	1.6723	22.60	20.00	0.00	42.60	196.71	154.11	96.32	7.55	103.87	10	1038.7	20	0.20
		PBAT-w 10 C	10/18/19	52.0579	1.6723	23.78	20.00	0.00	43.78	203.42	159.64	99.78	7.55	107.32	10	1073.2	21	0.21
		PBAT-w 50 A	10/18/19	52.0579	1.6723	22.62	20.00	0.00	42.62	201.79	159.17	99.48	7.55	107.03	50	5351.4	103	1.43
		PBAT-w 50 B	10/18/19	52.0579	1.6723	23.78	20.00	0.00	43.78	203.33	159.55	99.72	7.55	107.27	50	5363.3	103	1.43
		PBAT-w 50 C	10/18/19	52.0579	1.6723	22.50	20.00	0.00	42.50	201.90	159.40	99.63	7.55	107.17	50	5358.6	103	1.43
		PBAT-w 100 A	10/18/19	52.0579	1.6723	22.13	20.00	0.00	42.13	201.59	159.46	99.66	7.55	107.21	100	10721.0	206	3.26
		PBAT-w 100 B	10/18/19	52.0579	1.6723	24.21	20.00	0.00	44.21	203.63	159.42	99.64	7.55	107.18	100	10718.5	206	3.26
		PBAT-w 100 C	10/18/19	52.0579	1.6723	24.93	20.00	0.00	44.93	201.47	156.54	97.84	7.55	105.38	100	10538.5	202	3.22
		PBAT-w 500 A	10/15/19	52.0579	1.6723	23.91	20.00	0.00	43.91	203.90	159.99	99.99	7.55	107.54	500	53770.5	1033	17.13
		PBAT-w 500 B	10/15/19	52.0579	1.6723	23.63	20.00	0.00	43.63	203.50	159.87	99.92	7.55	107.47	500	53733.0	1032	17.12
		PBAT-w 500 C	10/15/19	52.0579	1.6723	22.83	20.00	0.00	42.83	207.25	164.42	102.76	7.55	110.31	500	55154.8	1059	17.39
		additional measurements (pyrochar, oPOM)
		pyrochar 500 D	09/17/20	52.0579	1.6723	23.88	20.00	0.00	43.88	203.16	159.28	99.55	7.55	107.10	500	53548.6	1029	17.09
		pyrochar 500 E	09/17/20	52.0579	1.6723	24.07	20.00	0.00	44.07	203.41	159.34	99.59	7.55	107.13	500	53567.3	1029	17.09
		pyrochar 500 F	09/17/20	52.0579	1.6723	22.82	20.00	0.00	42.82	202.19	159.37	99.61	7.55	107.15	500	53576.7	1029	17.09
		farm-oLF 500 D	09/17/20	52.0579	1.6723	23.84	20.00	0.00	43.84	203.09	159.25	99.53	7.55	107.08	500	53539.2	1028	17.08
		farm-oLF 500 E	09/17/20	52.0579	1.6723	24.20	20.00	0.00	44.20	203.53	159.33	99.58	7.55	107.13	500	53564.2	1029	17.09
		farm-oLF 500 F	09/17/20	52.0579	1.6723	22.83	20.00	0.00	42.83	202.05	159.22	99.51	7.55	107.06	500	53529.8	1028	17.08

## Sheet: Recovery rates
		Sample			initial POM	flask (empty)	flask+POM	extracted POM	recovery rate
					[mg]	[mg]	[mg]	[mg]	[%]
														Recovery rates																							Changes of recovery rates compared to 0 J ml-1
		farm oPOM	0	A	100	5304.2	5399.5	95.3	95.3
			0	B	100	5229.6	5326.7	97.1	97.1						recovery rate [%w/w]																							decrease compared to 0 J ml-1 [%w/w]
			0	C	100	5309.2	5401.8	92.6	92.6					sample	0 J ml-1				10 J ml-1				50 J ml-1				100 J ml-1				500 J ml-1						sample	10 J ml-1			50 J ml-1			100 J ml-1			500 J ml-1
			0	mv						95.0				sample	mv		sd		mv		sd		mv		sd		mv		sd		mv		sd					mv		sd	mv		sd	mv		sd	mv		sd
			0	sd						2.3				farm oPOM	95.0	±	2.3		80.8	±	4.5		73.2	±	6.1		72.3	±	2.8		51.6	±	7.2				farm oPOM	14.2	±	6.7	21.8	±	8.3	22.7	±	5.1	43.4	±	9.4
														forest oPOM	89.3	±	5.4		79.0	±	5.1		76.9	±	8.4		67.8	±	3.6		48.7	±	5.4				forest oPOM	10.3	±	10.5	12.4	±	13.8	21.5	±	9.1	40.6	±	10.8
			10	A	100	5305.6	5391.4	85.8	85.8					pyrochar	93.5	±	10.1		84.6	±	6.1		78.1	±	2.5		74.3	±	1.9		63.8	±	3.1				pyrochar	8.9	±	16.2	15.4	±	12.6	19.2	±	12.0	29.7	±	13.2
			10	B	100	5315.2	5394.5	79.3	79.3					LD-PE	96.9	±	1.2		97.3	±	1.0		95.8	±	6.7		99.9	±	1.9		99.2	±	1.6				LD-PE	-0.4	±	2.2	1.1	±	7.9	-3.0	±	3.1	-2.3	±	2.8
			10	C	100	5333.9	5411.1	77.2	77.2					LD-PE (w)	93.9	±	3.4		96.5	±	1.2		96.6	±	1.5		98.9	±	3.0		97.8	±	1.7				LD-PE (w)	-2.6	±	4.6	-2.7	±	4.9	-4.9	±	6.4	-3.9	±	5.1
			10	mv						80.8				PET	98.6	±	2.5		94.0	±	1.6		98.7	±	2.5		98.5	±	2.0		94.3	±	1.3				PET	4.6	±	4.1	-0.1	±	5.0	0.1	±	4.5	4.3	±	3.8
			10	sd						4.5				PET (w)	96.2	±	2.5		95.4	±	3.0		97.0	±	2.0		95.5	±	1.0		96.4	±	3.3				PET (w)	0.8	±	5.5	-0.8	±	4.5	0.7	±	3.5	-0.2	±	5.8
			p-value (10⭤0)							0.008				PBAT	99.6	±	2.5		99.5	±	0.9		90.9	±	13.8		98.3	±	3.6		98.2	±	0.9				PBAT	0.2	±	3.4	8.7	±	16.3	1.3	±	6.1	1.5	±	3.4
														PBAT (w)	97.7	±	0.9		99.3	±	1.9		96.8	±	1.6		96.6	±	1.7		99.3	±	1.9				PBAT (w)	-1.6	±	2.8	0.9	±	2.5	1.1	±	2.6	-1.6	±	2.8
			50	A	100	5281.4	5360.3	78.9	78.9
			50	B	100	5275.7	5349.5	73.8	73.8
			50	C	100	5311.4	5378.2	66.8	66.8
			50	mv						73.2
			50	sd						6.1
			p-value (10⭤0)							0.004
			100	A	100	5337.5	5411.8	74.3	74.3
			100	B	100	5277.8	5351.4	73.6	73.6
			100	C	100	5286.0	5355.1	69.1	69.1
			100	mv						72.3
			100	sd						2.8
			p-value (10⭤0)							0.000
			500	A	100	89489.0	89546.7	57.7	57.7
			500	B	100	89734.5	89787.9	53.4	53.4
			500	C	100	89568.4	89612.1	43.7	43.7
			500	mv						51.6
			500	sd						7.2
			p-value (10⭤0)							0.001
		forest oPOM	0	A	100	5311.2	5406.6	95.4	95.4
			0	B	100	5257.8	5342.8	85.0	85.0
			0	C	100	5280.8	5368.3	87.5	87.5
			0	mv						89.3
			0	sd						5.4
			10	A	100	5291.3	5364.6	73.3	73.3
			10	B	100	5276.8	5357.4	80.6	80.6
			10	C	100	5266.9	5350.0	83.1	83.1
			10	mv						79.0
			10	sd						5.1
			p-value (10⭤0)							0.075
			50	A	100	5250.1	5323.7	73.6	73.6
			50	B	100	5304.1	5390.5	86.4	86.4
			50	C	100	5271.5	5342.2	70.7	70.7
			50	mv						76.9
			50	sd						8.4
			p-value (10⭤0)							0.097
			100	A	100	5275.5	5342.5	67.0	67.0
			100	B	100	5298.3	5370.1	71.8	71.8
			100	C	100	5294.1	5358.8	64.7	64.7
			100	mv						67.8
			100	sd						3.6
			p-value (10⭤0)							0.005
			500	A	100	5290.2	5344.6	54.4	54.4
			500	B	100	5275.9	5323.9	48.0	48.0
			500	C	100	5275.8	5319.5	43.7	43.7
			500	mv						48.7
			500	sd						5.4
			p-value (10⭤0)							0.001
		pyrochar	0	A	200	88980.3	89189.7	209.4	104.7
			0	B	200	89508.1	89689.7	181.6	90.8
			0	C	200	88996.9	89166.9	170.0	85.0
			0	mv						93.5
			0	sd						10.1
			10	A	200	88822.8	88980.0	157.2	78.6
			10	B	200	89818.1	89986.7	168.6	84.3
			10	C	200	88416.4	88598.0	181.6	90.8
			10	mv						84.6
			10	sd						6.1
			p-value (10⭤0)							0.261
			50	A	200	89815.6	89966.0	150.4	75.2
			50	B	200	89316.6	89476.6	160.0	80.0
			50	C	200	90250.4	90408.3	157.9	79.0
			50	mv						78.1
			50	sd						2.5
			p-value (10⭤0)							0.062
			100	A	200	89307.6	89457.5	149.9	74.9
			100	B	200	90094.4	90238.7	144.3	72.2
			100	C	200	9066.5	9218.1	151.6	75.8
			100	mv						74.3
			100	sd						1.9
			p-value (10⭤0)							0.032
			500	A	200	9208.3	9341.3	133.0	66.5
			500	B	200	9243.8	9372.8	129.0	64.5
			500	C	200	9196.8	9317.8	121.0	60.5
			500	mv						63.8
			500	sd						3.1
			p-value (10⭤0)							0.008
		LD-PE	0	A	200	5289.4	5480.6	191.2	95.6
			0	B	200	5326.6	5522.3	195.7	97.8
			0	C	200	5264.8	5459.3	194.5	97.3
			0	mv						96.9
			0	sd						1.2
			10	A	200	5366.0	5559.8	193.8	96.9
			10	B	200	5366.9	5560.0	193.1	96.6
			10	C	200	5245.6	5442.6	197.0	98.5
			10	mv						97.3
			10	sd						1.0
			p-value (10⭤0)							0.668
			50	A	200	5325.3	5501.4	176.1	88.0
			50	B	200	5260.3	5460.2	199.9	99.9
			50	C	200	5304.3	5503.3	199.0	99.5
			50	mv						95.8
			50	sd						6.7
			p-value (10⭤0)							0.801
			100	A	200	5297.4	5493.7	196.3	98.2
			100	B	200	5275.6	5474.8	199.2	99.6
			100	C	200	5273.4	5477.4	204.0	102.0
			100	mv						99.9
			100	sd						1.9
			p-value (10⭤0)							0.082
			500	A	200	5348.3	5550.1	201.8	100.9
			500	B	200	5290.4	5485.9	195.5	97.8
			500	C	200	5301.0	5498.8	197.8	98.9
			500	mv						99.2
			500	sd						1.6
			p-value (10⭤0)							0.116
		LD-PE (w)	0	A	200	5251.7	5433.6	181.9	91.0
			0	B	200	5285.2	5480.4	195.2	97.6
			0	C	200	5315.1	5501.6	186.5	93.3
			0	mv						93.9
			0	sd						3.4
			10	A	200	5271.3	5466.6	195.3	97.7
			10	B	200	5271.7	5462.1	190.4	95.2
			10	C	200	5250.3	5443.7	193.4	96.7
			10	mv						96.5
			10	sd						1.2
			p-value (10⭤0)							0.281
			50	A	200	5165.0	5361.0	196.0	98.0
			50	B	200	5312.0	5505.7	193.7	96.8
			50	C	200	5291.0	5481.1	190.1	95.1
			50	mv						96.6
			50	sd						1.5
			p-value (10⭤0)							0.274
			100	A	200	5382.4	5573.2	190.8	95.4
			100	B	200	5263.2	5464.3	201.1	100.6
			100	C	200	5256.5	5457.9	201.4	100.7
			100	mv						98.9
			100	sd						3.0
			p-value (10⭤0)							0.131
			500	A	200	5308.9	5505.9	197.0	98.5
			500	B	200	5327.0	5518.7	191.7	95.8
			500	C	200	5247.8	5446.1	198.3	99.2
			500	mv						97.8
			500	sd						1.7
			p-value (10⭤0)							0.150
		PET	0	A	200	5291.6	5490.2	198.6	99.3
			0	B	200	5315.9	5517.4	201.5	100.8
			0	C	200	5280.1	5471.8	191.7	95.8
			0	mv						98.6
			0	sd						2.5
			10	A	200	5306.7	5498.3	191.6	95.8
			10	B	200	5283.3	5469.5	186.2	93.1
			10	C	200	5329.4	5515.6	186.2	93.1
			10	mv						94.0
			10	sd						1.6
			p-value (10⭤0)							0.054
			50	A	200	5325.7	5526.0	200.3	100.2
			50	B	200	5241.4	5441.8	200.4	100.2
			50	C	200	5362.9	5554.6	191.7	95.9
			50	mv						98.7
			50	sd						2.5
			p-value (10⭤0)							0.963
			100	A	200	5255.3	5451.1	195.8	97.9
			100	B	200	5277.4	5479.0	201.6	100.8
			100	C	200	5304.1	5497.9	193.8	96.9
			100	mv						98.5
			100	sd						2.0
			p-value (10⭤0)							0.960
			500	A	200	89642.0	89827.7	185.7	92.8
			500	B	200	88958.8	89148.7	189.9	94.9
			500	C	200	89072.2	89262.7	190.5	95.3
			500	mv						94.3
			500	sd						1.3
			p-value (10⭤0)							0.059
		PET (w)	0	A	200	89556.8	89755.8	199.0	99.5
			0	B	200	89219.5	89411.5	192.0	96.0
			0	C	200	89477.7	89664.0	186.3	93.2
			0	mv						96.2
			0	sd						3.2
			10	A	200	84072.1	84256.0	183.9	91.9
			10	B	200	90140.5	90333.8	193.3	96.7
			10	C	200	89016.6	89211.8	195.2	97.6
			10	mv						95.4
			10	sd						3.0
			p-value (10⭤0)							0.763
			50	A	200	89484.6	89675.3	190.7	95.3
			50	B	200	91744.0	91936.9	192.9	96.4
			50	C	200	89011.6	89209.9	198.3	99.1
			50	mv						97.0
			50	sd						2.0
			p-value (10⭤0)							0.740
			100	A	200	89602.0	89791.4	189.4	94.7
			100	B	200	89233.6	89424.2	190.6	95.3
			100	C	200	89773.5	89966.8	193.3	96.7
			100	mv						95.5
			100	sd						1.0
			p-value (10⭤0)							0.747
			500	A	200	89814.9	90014.8	199.9	100.0
			500	B	200	89454.2	89646.1	191.9	96.0
			500	C	200	89234.8	89421.5	186.7	93.3
			500	mv						96.4
			500	sd						3.3
			p-value (10⭤0)							0.944
		PBAT	0	A	200	5260.3	5465.3	205.0	102.5
			0	B	200	5272.7	5469.8	197.1	98.6
			0	C	200	5293.7	5489.4	195.7	97.8
			0	mv						99.6
			0	sd						2.5
			10	A	200	5269.0	5466.6	197.6	98.8
			10	B	200	5291.0	5489.2	198.2	99.1
			10	C	200	5344.6	5545.6	201.0	100.5
			10	mv						99.5
			10	sd						0.9
			p-value (10⭤0)							0.919
			50	A	200	5305.3	5499.2	193.9	96.9
			50	B	200	5314.4	5464.7	150.3	75.2
			50	C	200	5303.7	5505.0	201.3	100.7
			50	mv						90.9
			50	sd						13.8
			p-value (10⭤0)							0.342
			100	A	200	5222.3	5426.8	204.5	102.3
			100	B	200	5310.9	5506.0	195.1	97.6
			100	C	200	5275.1	5465.4	190.3	95.1
			100	mv						98.3
			100	sd						3.6
			p-value (10⭤0)							0.631
			500	A	200	89106.1	89303.0	196.9	98.4
			500	B	200	89214.9	89409.2	194.3	97.2
			500	C	200	89778.5	89976.4	197.9	98.9
			500	mv						98.2
			500	sd						0.9
			p-value (10⭤0)							0.401
		PBAT (w)	0	A	200	89754.7	89949.0	194.3	97.2
			0	B	200	89215.7	89410.1	194.4	97.2
			0	C	200	89282.0	89479.6	197.6	98.8
			0	mv						97.7
			0	sd						0.9
			10	A	200	89386.8	89581.0	194.2	97.1
			10	B	200	89831.1	90019.8	188.7	94.3
			10	C	200	89090.2	89283.9	193.7	96.8
			10	mv						96.1
			10	sd						1.5
			p-value (10⭤0)							0.192
			50	A	200	89195.9	89392.3	196.4	98.2
			50	B	200	89328.7	89518.8	190.1	95.1
			50	C	200	89005.1	89199.4	194.3	97.1
			50	mv						96.8
			50	sd						1.6
			p-value (10⭤0)							0.441
			100	A	200	89055.1	89245.9	190.8	95.4
			100	B	200	89143.0	89334.8	191.8	95.9
			100	C	200	89653.9	89850.9	197.0	98.5
			100	mv						96.6
			100	sd						1.7
			p-value (10⭤0)							0.369
			500	A	200	89536.4	89737.6	201.2	100.6
			500	B	200	89631.1	89825.3	194.2	97.1
			500	C	200	89222.3	89422.6	200.3	100.2
			500	mv						99.3
			500	sd						1.9
			p-value (10⭤0)							0.270
		Additional measurements (pyrochar, oPOM), balance losses.																					C in oPOMs
		Sample			initial POM	flask 1 (empty)	flask +POM	extracted POM	recovery rate	flask 2 (empty)	flask 2 +POM	sedi	C (sedi)	POM (sedi)	POM (sedi)	loss POM (filter)	loss DOM	loss DOM	bal. loss				Sample			C (POM)
					[mg]	[mg]	[mg]	[mg]	[%]	[mg]	[mg]	[g]	[mg/g]	[mg]	[%]	[%]	[mg]	[%]	[%]							[%]
		Pyrochar	0	D	200			155.3	77.7	14421.6	41163.9	26.74	0.49	17.19	8.60		0.67	0.334	13.41				Pyrochar	0	D	75.69
			0	E	200	5291.0	5448.8	167.5	83.8	14417.5	40807.4	26.39	0.51	17.06	8.53		0.54	0.268	7.45					0	E	78.83
			0	F	200	5283.0	5428.7	154.7	77.3	17226.3	42728.5	25.50	0.57	18.12	9.06		0.66	0.328	13.28					0	F	79.79
			0	mv					79.6						8.7			0.3	11.4					0	mv	78.10
			0	sd					3.6						0.3			0.0	3.4					0	sd	2.14
		Pyrochar	500	D	200	5332.6	5432.5	106.1	53.0	25458.8	52484.5	27.03	1.83	69.00	34.50		0.99	0.496	11.98				Pyrochar	0	D	71.64
			500	E	200	5321.9	5435.0	120.1	60.0	25281.4	53195.3	27.91	1.66	62.90	31.45		1.24	0.622	7.89					0	E	73.47
			500	F	200	5286.7	5380.8	99.9	49.9	25204.8	52068.2	26.86	2.16	77.62	38.81		1.27	0.636	10.61					0	F	74.73
			500	mv					54.3						34.9			0.6	10.2					0	mv	73.28
			500	sd					5.2						3.7			0.1	2.1					0	sd	1.55
			t-test						0.002						0.000			0.005	0.625
		farm-oLF	0	A	200	5309.7	5442.2	140.7	70.3	14398.0	44937.5	30.54	0.26	16.55	8.28		5.48	2.741	18.65				farm-oLF	10	A	48.64
			0	B	200	5278.2	5404.7	134.3	67.1	14520.8	41062.0	26.54	0.29	16.40	8.20		5.53	2.765	21.89					10	B	46.57
			0	C	200	5284.2	5391.7	114.1	57.1	14423.6	40822.8	26.40	0.31	16.99	8.49		5.48	2.739	31.71					10	C	47.50
			0	mv					64.8						8.3			2.7	24.1					10	mv	47.57
			0	sd					6.9						0.2			0.0	6.8					10	sd	1.04
		farm-oLF	500	A	200			106.3	53.1	25274.2	53387.6	28.11	0.76	47.33	23.66		9.85	4.924	18.28				farm-oLF	10	A	44.86
			500	B	200			107.8	53.9	25546.6	52564.5	27.02	0.62	39.48	19.74		10.48	5.240	21.14					10	B	42.09
			500	C	200			113.6	56.8	25568.6	52508.4	26.94	0.57	35.28	17.64		10.12	5.060	20.50					10	C	43.26
			500	mv					54.6						20.3			5.1	20.0					10	mv	43.40
			500	sd					1.9						3.1			0.2	1.5					10	sd	1.39
			t-test						0.069						0.002			0.000	0.365

## Sheet: Particle size distributions
																																												comminution factor
						5.64	10.00	20.00	30.00	45,24	86.48	127.72	168.97	210.21	251.45	292.69	333.93	375.17	416.41	457.66	498.90	540.14	581.38	622.62	663.86	705.10	746.35	787.59	828.83	870.07	911.31	952.55	993.00	1035.03	1076.28	1117.52	1158.76	1200.00	1826.94		x10	x50 (median)	x90	x10	x50
		farm oPOM	0 J/ml	0 J/ml A		0.01	0.01	0.19	1.36	4.58	12.20	17.35	21.80	26.05	30.65	34.97	38.76	42.53	45.38	47.88	49.43	51.05	53.87	57.77	61.13	63.55	66.64	70.49	71.56	71.97	72.70	73.99	73.99	74.44	74.70	76.19	77.94	79.78	100.00		74.57	513.41	1516.82	1.00	1.00
				0 J/ml B		0.01	0.01	0.16	1.15	3.97	9.41	13.04	16.32	19.02	21.67	24.38	26.38	28.62	31.50	33.54	36.82	39.55	42.75	47.77	51.82	55.71	58.60	62.53	68.22	70.14	71.65	73.53	75.71	80.00	81.52	83.28	83.28	85.61	100.00		93.19	645.32	1391.14	1.00	1.00
				0 J/ml C		0.01	0.01	0.19	1.33	4.39	10.87	15.57	19.67	23.57	27.28	30.82	34.04	37.08	41.09	44.50	48.23	51.00	54.65	58.92	62.08	65.16	68.08	72.34	76.85	77.58	79.42	84.52	88.15	90.85	90.85	90.85	94.31	95.19	100.00		80.95	525.26	1022.02	1.00	1.00
				0 J/ml mv		0.01	0.01	0.18	1.28	4.31	10.83	15.32	19.26	22.88	26.53	30.06	33.06	36.08	39.32	41.97	44.83	47.20	50.42	54.82	58.34	61.47	64.44	68.45	72.21	73.23	74.59	77.35	79.28	81.76	82.36	83.44	85.18	86.86	100.00		82.90	561.33	1309.99	1.00	1.00
				sd		0.00	0.00	0.02	0.11	0.31	1.40	2.17	2.76	3.57	4.54	5.34	6.25	7.01	7.11	7.50	6.96	6.63	6.66	6.13	5.67	5.06	5.11	5.21	4.35	3.88	4.22	6.22	7.73	8.35	8.11	7.33	8.35	7.78	0.00		9.46	72.98	257.19	0.00	0.00
			10 J/ml	10 J/ml A		N/A
				10 J/ml B		N/A
				10 J/ml C		N/A
				10 J/ml mv		N/A
				sd		N/A
				p-value (10⭤0)		N/A
			50 J/ml	50 J/ml A		0.01	0.02	0.33	2.20	7.32	17.69	24.49	29.91	34.77	39.08	42.62	46.36	49.17	50.93	53.84	56.17	58.21	62.72	67.78	70.45	71.97	77.92	82.80	86.03	86.44	86.92	87.72	87.95	88.97	90.19	90.58	91.38	91.38	100.00		55.91	394.60	1069.98	1.33	1.30
				50 J/ml B		0.01	0.02	0.21	1.19	3.23	10.01	17.00	23.93	30.10	35.94	42.29	47.51	51.91	56.09	59.47	62.57	64.30	66.65	68.38	71.06	71.58	72.38	75.39	77.57	79.26	83.00	87.13	87.32	90.20	91.70	94.59	99.11	100.00	100.00		86.44	357.30	1032.22	1.08	1.81
				50 J/ml C		0.01	0.02	0.21	1.40	4.56	12.21	18.23	23.48	28.01	31.93	35.57	38.60	42.52	45.70	50.64	53.13	55.67	58.86	63.25	66.85	71.81	75.23	75.85	76.13	76.73	78.36	78.77	79.42	79.42	79.42	79.95	81.66	89.88	100.00		74.59	452.29	1207.17	1.09	1.16
				50 J/ml mv		0.01	0.02	0.25	1.60	5.04	13.30	19.91	25.77	30.96	35.65	40.16	44.16	47.87	50.91	54.65	57.29	59.39	62.74	66.47	69.45	71.79	75.18	78.01	79.91	80.81	82.76	84.54	84.90	86.20	87.10	88.37	90.72	93.75	100.00		72.31	401.40	1103.12	1.17	1.42
				sd		0.00	0.00	0.07	0.53	2.09	3.96	4.02	3.59	3.46	3.58	3.98	4.85	4.83	5.20	4.47	4.82	4.44	3.90	2.80	2.28	0.20	2.77	4.15	5.35	5.04	4.29	5.01	4.75	5.90	6.70	7.57	8.74	5.46	0.00		15.39	47.86	92.06	0.15	0.34
				p-value (50⭤0)		1.000	0.000	0.165	0.371	0.585	0.364	0.157	0.068	0.048	0.052	0.058	0.072	0.074	0.085	0.066	0.063	0.057	0.050	0.040	0.035	0.024	0.033	0.068	0.125	0.108	0.078	0.194	0.344	0.494	0.478	0.463	0.472	0.277	#ZAHL!		0.367	0.034	0.260
			100 J/ml	100 J/ml A		0.02	0.03	0.36	2.34	7.52	18.32	25.73	31.86	37.32	41.54	44.68	47.13	50.16	54.08	56.74	59.70	64.26	66.92	68.66	69.12	69.82	71.19	72.40	72.40	74.68	75.08	77.48	77.90	79.69	81.51	90.47	91.65	92.06	100.00		54.72	372.98	1115.34	1.36	1.38
				100 J/ml B		0.02	0.03	0.44	2.84	8.62	19.65	26.98	32.62	36.52	40.20	44.10	48.17	52.10	55.56	58.29	61.08	65.17	67.26	69.51	73.01	76.51	78.30	78.65	81.45	83.02	83.02	83.43	83.43	83.95	85.16	85.82	85.82	85.82	100.00		50.39	353.11	1384.68	1.85	1.83
				100 J/ml C		0.02	0.03	0.34	2.29	7.40	18.30	25.65	31.75	37.51	43.00	48.36	52.84	56.67	60.30	63.42	67.56	71.33	73.73	76.03	77.75	81.19	83.27	85.08	86.36	87.35	90.70	92.36	95.05	95.43	96.84	96.84	96.84	98.25	100.00		55.08	307.82	902.73	1.47	1.71
				100 J/ml mv		0.02	0.03	0.38	2.49	7.85	18.76	26.12	32.08	37.12	41.58	45.71	49.38	52.98	56.65	59.48	62.78	66.92	69.30	71.40	73.29	75.84	77.59	78.71	80.07	81.68	82.93	84.42	85.46	86.36	87.84	91.04	91.44	92.04	100.00		53.40	344.64	1134.25	1.56	1.64
				sd		0.00	0.00	0.05	0.30	0.67	0.77	0.75	0.47	0.53	1.40	2.31	3.04	3.34	3.25	3.50	4.20	3.85	3.84	4.03	4.32	5.71	6.07	6.34	7.08	6.44	7.81	7.49	8.75	8.14	8.01	5.53	5.51	6.22	0.00		2.61	33.40	241.53	0.26	0.23
				p-value (100⭤0)		0.000	0.000	0.003	0.003	0.001	0.001	0.001	0.001	0.002	0.005	0.010	0.015	0.020	0.018	0.021	0.019	0.011	0.013	0.017	0.022	0.031	0.045	0.096	0.177	0.123	0.179	0.276	0.411	0.532	0.452	0.225	0.339	0.418	#ZAHL!		0.006	0.009	0.437
			500 J/ml	500 J/ml A		0.04	0.07	0.88	3.97	8.98	20.86	28.86	34.83	39.48	43.41	47.32	50.39	53.25	56.54	59.10	61.87	64.09	67.15	69.37	72.41	75.21	77.97	80.74	82.86	83.67	85.49	86.23	86.36	87.40	90.42	90.64	90.88	91.84	100.00		48.79	328.67	1070.52	1.53	1.56
				500 J/ml B		0.04	0.06	0.87	4.09	9.15	20.06	26.79	32.02	36.09	39.66	42.81	45.41	48.22	50.91	54.04	56.78	59.22	61.78	64.65	67.64	70.89	73.69	77.35	81.26	83.85	86.81	87.70	88.52	91.59	91.59	92.49	93.54	93.81	100.00		48.46	402.46	1013.64	1.92	1.60
				500 J/ml C		0.03	0.06	0.83	4.16	10.35	24.58	33.32	39.32	44.36	48.74	52.71	56.07	59.11	61.64	64.55	66.64	68.84	70.45	71.92	74.94	77.64	81.73	84.56	86.39	88.27	88.69	90.16	91.08	91.28	93.77	93.77	94.29	94.29	100.00		44.38	264,51	948,09	1.82	1.99
				500 J/ml mv	The farm oPOM shows a significant reduction of particle size at >50 J/ml by the 10% quantile and median with a tendency to be communited even at <50 J/ml. The 10 J/ml sample was lost during the experiment.	0.04	0.06	0.86	4.07	9.49	21.83	29.66	35.39	39.98	43.94	47.61	50.62	53.53	56.36	59.23	61.76	64.05	66.46	68.65	71.66	74.58	77.80	80.88	83.50	85.26	87.00	88.03	88.65	90.09	91.93	92.30	92.90	93.31	100.00		47.21	365.57	1042.08	1.76	1.72
				sd		0.01	0.01	0.03	0.10	0.75	2.41	3.34	3.68	4.16	4.56	4.96	5.33	5.45	5.37	5.26	4.93	4.81	4.38	3.69	3.71	3.42	4.02	3.61	2.62	2.61	1.61	1.99	2.36	2.33	1.70	1.57	1.79	1.30	0.00		2.46	52.18	40.22	0.21	0.23
				p-value (500⭤0)		0.001	0.000	0.000	0.000	0.000	0.002	0.003	0.004	0.006	0.009	0.014	0.021	0.027	0.030	0.031	0.026	0.023	0.025	0.029	0.027	0.020	0.024	0.027	0.018	0.011	0.009	0.047	0.115	0.171	0.116	0.110	0.192	0.229	#ZAHL!		0.003	0.049	0.259
		forest oPOM	0 J/ml	0 J/ml A		0.00	0.01	0.10	0.52	1.62	5.86	10.00	15.11	20.53	25.49	30.18	33.82	37.06	40.03	44.46	49.44	52.99	55.02	58.29	60.83	63.08	64.66	66.08	69.62	70.96	72.64	73.64	75.11	78.29	78.29	78.29	78.29	78.29	100.00		127.73	505.37	1538.15	1.00	1.00
				0 J/ml B		0.01	0.01	0.11	0.60	1.87	8.79	14.92	20.32	24.83	28.99	32.83	36.24	38.65	41.70	45.82	47.91	50.20	52.32	53.89	55.00	56.34	58.46	58.70	59.14	59.14	59.26	59.26	59.43	59.43	59.85	59.85	60.09	62.67	100.00		94.63	536.59	1658.99	1.00	1.00
				0 J/ml C		0.01	0.01	0.14	0.76	2.25	7.96	13.41	19.31	25.42	31.66	38.36	44.21	48.65	53.42	57.95	61.79	65.40	70.52	74.76	78.02	81.84	83.86	87.32	88.68	90.46	91.95	94.53	95.50	98.01	100.00	100.00	100.00	100.00	100.00		101.89	386.83	859.43	1.00	1.00
				0 J/ml mv		0.01	0.01	0.12	0.63	1.91	7.54	12.78	18.25	23.59	28.71	33.79	38.09	41.45	45.05	49.41	53.05	56.20	59.29	62.31	64.62	67.09	68.99	70.70	72.48	73.52	74.62	75.81	76.68	78.58	79.38	79.38	79.46	80.32	100.00		108.08	476.26	1352.19	1.00	1.00
				sd		0.01	0.00	0.02	0.12	0.32	1.51	2.52	2.76	2.67	3.09	4.17	5.44	6.28	7.30	7.43	7.61	8.09	9.82	11.00	11.97	13.21	13.24	14.86	14.98	15.82	16.43	17.73	18.09	19.29	20.10	20.10	19.98	18.75	0.00		17.40	79.01	431.00	0.00	0.00
			10 J/ml	10 J/ml A		0.01	0.01	0.17	0.94	2.86	10.13	16.66	22.89	28.36	33.38	37.65	42.23	46.27	50.00	54.05	57.86	62.60	69.50	73.05	74.79	76.48	80.61	81.29	84.39	88.81	90.28	90.28	91.77	91.77	91.77	94.19	94.19	94.19	100.00		85.76	416.42	903.50	1.49	1.21
				10 J/ml B		0.01	0.01	0.17	0.94	2.85	10.28	17.10	23.74	30.11	36.27	42.65	47.80	51.69	55.54	58.72	62.71	66.19	69.41	72.45	77.78	82.08	84.10	87.68	91.06	92.63	93.97	94.32	94.55	95.00	97.00	97.00	97.00	97.00	100.00		84.91	357.25	815.92	1.11	1.50
				10 J/ml C		0.01	0.01	0.13	0.72	2.15	7.70	12.97	18.25	23.34	27.95	32.13	35.92	39.64	42.80	46.14	50.63	54.73	56.80	59.20	62.18	64.11	66.83	69.69	71.49	73.12	75.72	76.09	76.09	76.09	76.09	76.09	76.09	83.90	100.00		104.45	493.13	1437.62	0.98	0.78
				10 J/ml mv		0.01	0.01	0.16	0.87	2.62	9.37	15.58	21.63	27.27	32.53	37.48	41.98	45.87	49.45	52.97	57.07	61.17	65.24	68.23	71.58	74.22	77.18	79.55	82.31	84.85	86.66	86.90	87.47	87.62	88.29	89.09	89.09	91.70	100.00		91.71	422.27	1052.35	1.19	1.17
				sd		0.00	0.00	0.02	0.13	0.41	1.45	2.27	2.96	3.51	4.22	5.26	5.94	6.04	6.39	6.36	6.08	5.86	7.31	7.83	8.28	9.20	9.13	9.12	9.95	10.34	9.65	9.57	9.95	10.12	10.88	11.35	11.35	6.90	0.00		11.04	68.13	336.52	0.27	0.36
				p-value (10⭤0)		0.374	1.000	0.090	0.078	0.077	0.204	0.226	0.221	0.222	0.275	0.396	0.450	0.430	0.476	0.563	0.514	0.437	0.447	0.490	0.454	0.485	0.428	0.429	0.397	0.358	0.335	0.395	0.417	0.512	0.537	0.506	0.508	0.380	#ZAHL!		0.241	0.421	0.396
			50 J/ml	50 J/ml A		0.01	0.01	0.15	0.80	2.26	7.72	13.59	19.35	24.77	29.86	34.27	38.46	41.94	46.31	50.19	55.03	58.25	61.13	64.33	67.29	68.09	71.97	73.98	75.31	76.13	76.41	79.21	80.03	80.30	80.30	82.41	84.68	87.70	100.00		102.49	455.58	1317.40	1.25	1.11
				50 J/ml B		0.01	0.02	0.24	1.58	5.64	13.33	18.16	22.13	25.63	29.41	32.50	35.41	38.19	41.62	43.94	47.29	50.62	53.67	56.11	58.53	61.10	62.40	64.33	65.69	67.22	70.97	73.59	75.38	76.93	78.25	79.59	85.20	87.03	100.00		68.63	532.46	1343.47	1.38	1.01
				50 J/ml C		0.01	0.02	0.18	0.97	2.99	10.52	16.53	21.87	26.51	30.64	34.78	38.24	41.80	46.01	49.06	53.12	56.44	59.51	61.44	63.61	65.26	67.82	71.03	73.79	77.41	81.82	83.81	85.34	85.73	87.20	87.20	87.20	87.20	100.00		83.64	467.20	1336.96	1.22	0.83
				50 J/ml mv		0.01	0.02	0.19	1.12	3.63	10.52	16.09	21.12	25.64	29.97	33.85	37.37	40.64	44.65	47.73	51.81	55.10	58.10	60.63	63.14	64.82	67.40	69.78	71.60	73.59	76.40	78.87	80.25	80.99	81.92	83.07	85.69	87.31	100.00		84.92	485.08	1332.61	1.28	0.98
				sd		0.00	0.01	0.05	0.41	1.78	2.81	2.32	1.54	0.87	0.62	1.20	1.70	2.13	2.63	3.33	4.03	3.99	3.92	4.17	4.40	3.52	4.80	4.94	5.17	5.55	5.43	5.12	4.98	4.44	4.69	3.85	1.33	0.35	0.00		16.97	41.44	13.57	0.09	0.14
				p-value (50⭤0)		0.374	0.116	0.065	0.118	0.175	0.180	0.169	0.191	0.276	0.528	0.982	0.837	0.843	0.933	0.739	0.816	0.844	0.856	0.816	0.851	0.788	0.854	0.924	0.928	0.995	0.867	0.788	0.758	0.843	0.842	0.771	0.618	0.554	#ZAHL!		0.174	0.872	0.941
			100 J/ml	100 J/ml A		0.02	0.03	0.38	2.24	7.00	21.39	32.76	42.66	49.83	56.12	61.47	65.83	69.99	73.22	76.42	78.75	81.42	85.05	86.29	88.61	89.69	92.60	93.01	93.01	95.75	98.11	100.00	100.00	100.00	100.00	100.00	100.00	100.00	100.00		53.83	211.33	709.51	2.37	2.39
				100 J/ml B		0.02	0.04	0.46	2.69	8.67	25.76	37.56	46.70	53.73	59.46	64.05	67.81	71.66	74.60	76.54	78.42	80.60	82.45	85.26	87.18	87.91	88.83	90.98	92.03	93.15	94.49	94.72	94.96	94.96	94.96	94.96	94.96	94.96	100.00		48.45	188.33	768.78	1.95	2.85
				100 J/ml C		0.01	0.02	0.23	1.32	3.60	11.38	19.79	27.81	35.69	41.54	48.95	55.15	59.23	63.43	68.57	72.74	79.47	81.62	83.83	86.89	88.03	89.84	91.81	92.90	93.06	93.06	94.33	95.85	96.51	100.00	100.00	100.00	100.00	100.00		79.16	299.68	749.62	1.29	1.29
				100 J/ml mv		0.02	0.03	0.36	2.08	6.42	19.51	30.04	39.06	46.42	52.37	58.16	62.93	66.96	70.42	73.84	76.64	80.50	83.04	85.13	87.56	88.54	90.42	91.93	92.65	93.99	95.22	96.35	96.94	97.16	98.32	98.32	98.32	98.32	100.00		60.48	233.11	742.64	1.87	2.18
				sd		0.01	0.01	0.12	0.70	2.58	7.37	9.19	9.95	9.49	9.53	8.08	6.81	6.75	6.09	4.57	3.38	0.98	1.79	1.24	0.92	0.99	1.95	1.02	0.54	1.53	2.60	3.17	2.69	2.58	2.91	2.91	2.91	2.91	0.00		16.40	58.78	30.25	0.55	0.80
				p-value (100⭤0)		0.101	0.026	0.025	0.024	0.040	0.051	0.035	0.025	0.016	0.015	0.010	0.008	0.009	0.010	0.008	0.008	0.007	0.015	0.023	0.030	0.049	0.050	0.069	0.080	0.090	0.099	0.120	0.127	0.174	0.182	0.182	0.181	0.176	#ZAHL!		0.026	0.013	0.071
			500 J/ml	500 J/ml A		0.01	0.02	0.22	1.33	4.41	13.84	22.17	29.29	34.72	40.17	45.58	51.25	55.06	60.11	63.48	65.75	67.14	67.97	69.30	71.06	73.43	77.77	78.73	79.26	79.70	80.40	80.99	82.62	84.47	86.71	89.84	90.38	92.20	100.00		69.70	324.86	1129.93	1.83	1.56
				500 J/ml B		0.02	0.03	0.36	2.21	7.30	22.40	33.64	42.55	49.42	56.06	61.42	65.24	69.43	74.34	78.97	82.50	85.54	88.54	90.13	92.88	94.17	94.84	96.45	97.35	98.77	100.00	100.00	100.00	100.00	100.00	100.00	100.00	100.00	100.00		52.61	213.81	619.14	1.80	2.51
				500 J/ml C		0.02	0.04	0.54	3.44	10.50	26.86	37.83	46.28	52.27	57.19	62.10	65.89	70.79	74.67	77.18	78.71	80.78	82.76	83.95	88.15	88.70	90.04	91.06	91.39	93.21	93.21	93.21	93.21	93.21	96.42	96.42	98.20	100.00	100.00		44.16	194.57	745.04	2.31	1.99
				500 J/ml mv	A significant reduction in particle size was also shown for forest oPOM at energy levels >50 J/ml under consideration of the 10% quantile and median.	0.02	0.03	0.37	2.33	7.40	21.03	31.21	39.37	45.47	51.14	56.37	60.79	65.09	69.71	73.21	75.65	77.82	79.76	81.13	84.03	85.43	87.55	88.75	89.33	90.56	91.20	91.40	91.94	92.56	94.38	95.42	96.19	97.40	100.00		55.49	244.41	831.37	1.98	2.02
				sd		0.01	0.01	0.16	1.06	3.05	6.62	8.11	8.93	9.42	9.52	9.35	8.27	8.72	8.31	8.47	8.78	9.55	10.61	10.70	11.48	10.75	8.80	9.08	9.22	9.81	9.95	9.63	8.76	7.79	6.88	5.15	5.11	4.50	0.00		13.01	70.33	266.11	0.28	0.48
				p-value (500⭤0)		0.101	0.026	0.051	0.051	0.036	0.026	0.020	0.017	0.018	0.018	0.019	0.016	0.019	0.018	0.022	0.028	0.040	0.070	0.101	0.113	0.136	0.113	0.147	0.172	0.188	0.209	0.252	0.259	0.309	0.289	0.252	0.233	0.200	#ZAHL!		0.014	0.019	0.150
		pyrochar	0 J/ml	0 J/ml A		0.04	0.07	0.78	2.29	3.74	6.90	10.37	15.37	21.86	29.00	36.73	43.94	50.80	57.37	64.18	70.51	76.58	82.66	87.72	90.62	92.93	95.98	98.06	99.13	99.34	99.58	99.88	99.88	99.88	99.88	99.88	100.00	100.00	100.00		123.36	370.38	655.07	1.00	1.00
				0 J/ml B		0.02	0.04	0.49	1.48	2.44	5.13	9.36	15.73	22.86	30.76	38.53	45.85	52.78	59.32	65.43	71.10	76.14	81.22	85.45	88.86	91.61	94.25	95.78	96.76	97.68	98.67	98.84	99.10	99.28	99.49	99.63	99.71	99.81	100.00		131.88	358.62	680.96	1.00	1.00
				0 J/ml C		0.02	0.04	0.46	1.39	2.28	4.87	8.74	15.23	23.20	32.08	40.93	49.19	56.75	63.46	69.74	75.35	80.11	83.91	87.01	89.98	92.80	95.22	96.69	97.86	99.12	99.30	99.62	99.73	100.00	100.00	100.00	100.00	100.00	100.00		135.74	338.37	664.19	1.00	1.00
				0 J/ml mv		0.03	0.05	0.58	1.72	2.82	5.63	9.49	15.44	22.64	30.61	38.73	46.33	53.44	60.05	66.45	72.32	77.61	82.60	86.73	89.82	92.45	95.15	96.84	97.92	98.71	99.18	99.45	99.57	99.72	99.79	99.84	99.90	99.94	100.00		130.33	355.79	666.74	1.00	1.00
				sd		0.01	0.02	0.18	0.50	0.80	1.10	0.82	0.26	0.70	1.55	2.11	2.66	3.03	3.11	2.92	2.64	2.18	1.35	1.16	0.89	0.73	0.87	1.15	1.19	0.90	0.47	0.54	0.41	0.39	0.27	0.19	0.17	0.11	0.00		6.33	16.19	13.13	0.00	0.00
			10 J/ml	10 J/ml A		0.03	0.05	0.60	1.97	3.49	8.00	13.65	21.05	28.87	36.81	44.52	51.52	57.73	63.42	68.76	73.23	77.94	82.31	85.75	88.49	91.34	93.22	94.74	96.69	98.00	98.43	98.43	98.43	98.43	98.43	98.43	98.43	98.43	100.00		101.10	324.99	685.76	1.22	1.14
				10 J/ml B		0.03	0.05	0.55	1.75	2.94	5.89	9.44	14.80	21.23	28.34	35.70	42.29	48.71	54.94	60.82	66.64	72.30	76.51	80.99	84.49	86.90	90.53	93.28	95.22	95.98	96.93	97.31	97.75	98.03	98.42	98.54	98.82	98.98	100.00		132.01	383.71	740.36	1.00	0.93
				10 J/ml C		0.03	0.05	0.59	1.95	3.34	6.73	10.31	15.18	20.95	27.56	34.37	40.45	46.48	52.61	58.59	64.20	69.87	74.98	80.13	84.00	87.74	90.76	93.87	95.53	97.18	98.39	98.48	98.55	98.55	98.69	98.76	98.76	98.76	100.00		124.16	398.85	735.97	1.09	0.85
				10 J/ml mv		0.03	0.05	0.58	1.89	3.26	6.87	11.13	17.01	23.68	30.90	38.20	44.75	50.97	56.99	62.72	68.02	73.37	77.93	82.29	85.66	88.66	91.50	93.96	95.81	97.05	97.92	98.07	98.24	98.34	98.51	98.58	98.67	98.72	100.00		119.09	369.18	720.70	1.10	0.97
				sd		0.00	0.00	0.03	0.12	0.28	1.06	2.22	3.50	4.49	5.13	5.52	5.93	5.96	5.69	5.35	4.67	4.14	3.87	3.03	2.46	2.36	1.49	0.73	0.77	1.02	0.85	0.66	0.43	0.27	0.15	0.17	0.21	0.28	0.00		16.07	39.01	30.34	0.11	0.15
				p-value (10⭤0)		0.643	1.000	0.976	0.595	0.424	0.234	0.296	0.483	0.711	0.930	0.883	0.697	0.557	0.460	0.349	0.238	0.191	0.120	0.077	0.051	0.057	0.022	0.022	0.062	0.102	0.087	0.050	0.018	0.007	0.002	0.001	0.001	0.002	#ZAHL!		0.323	0.612	0.047
			50 J/ml	50 J/ml A		0.04	0.07	0.85	2.81	4.89	9.79	14.65	21.32	29.07	37.10	44.73	51.89	58.36	64.23	69.18	73.75	77.94	81.10	84.09	87.43	89.58	90.51	91.31	92.06	92.66	93.33	94.10	94.93	95.19	95.60	95.81	96.18	96.45	100.00		88.25	323.03	723.83	1.40	1.15
				50 J/ml B		0.05	0.08	1.01	3.44	6.18	12.58	17.88	23.74	30.06	36.74	43.94	49.82	55.29	60.87	66.10	70.63	75.32	79.01	82.74	85.59	87.54	90.14	91.53	92.97	93.44	93.84	94.02	94.02	94.10	94.20	94.32	94.32	94.48	100.00		69.83	335.27	744.17	1.89	1.07
				50 J/ml C		0.04	0.07	0.86	2.91	5.11	10.05	14.40	20.01	26.81	34.20	42.04	48.80	54.98	60.92	66.22	71.74	76.34	81.12	84.93	87.89	90.47	91.83	93.77	95.18	96.57	96.83	97.12	97.39	97.39	97.49	97.90	98.06	98.06	100.00		86.10	341.94	697.59	1.58	0.99
				50 J/ml mv		0.04	0.07	0.91	3.05	5.39	10.81	15.64	21.69	28.65	36.01	43.57	50.17	56.21	62.01	67.17	72.04	76.53	80.41	83.92	86.97	89.20	90.83	92.20	93.40	94.22	94.67	95.08	95.45	95.56	95.76	96.01	96.19	96.33	100.00		81.39	333.41	721.86	1.62	1.07
				sd		0.01	0.01	0.09	0.34	0.69	1.54	1.94	1.89	1.67	1.58	1.38	1.57	1.87	1.93	1.74	1.58	1.32	1.21	1.10	1.22	1.50	0.89	1.36	1.60	2.07	1.89	1.77	1.74	1.68	1.65	1.80	1.87	1.79	0.00		10.07	9.59	23.35	0.25	0.08
				p-value (50⭤0)		0.089	0.091	0.045	0.018	0.014	0.009	0.007	0.005	0.005	0.013	0.029	0.097	0.249	0.407	0.733	0.882	0.504	0.105	0.039	0.031	0.028	0.004	0.011	0.017	0.026	0.016	0.015	0.016	0.014	0.014	0.021	0.027	0.025	#ZAHL!		0.002	0.109	0.024
			100 J/ml	100 J/ml A		0.05	0.09	1.16	3.91	6.69	11.62	15.50	20.82	26.98	33.65	40.64	47.66	54.09	60.16	66.00	71.90	76.63	80.37	84.56	87.30	89.72	91.58	94.27	95.89	97.17	97.46	97.46	97.68	98.07	98.07	98.07	98.07	98.07	100.00		72.93	348.91	711.37	1.69	1.06
				100 J/ml B		0.02	0.04	0.49	1.48	2.33	5.05	8.50	13.70	20.14	27.41	34.73	41.57	48.44	55.04	61.57	67.25	73.05	79.10	83.76	87.94	91.22	93.94	95.98	97.75	98.65	99.04	99.14	99.31	99.37	99.54	99.63	99.85	100.00	100.00		139.64	384.95	689.75	0.94	0.93
				100 J/ml C		0.04	0.07	0.87	3.08	5.16	9.14	12.34	16.52	21.89	28.35	35.76	42.65	48.95	55.39	61.19	66.91	72.33	78.15	82.62	86.40	90.38	93.09	95.77	96.98	98.51	99.49	99.49	99.49	99.90	99.90	100.00	100.00	100.00	100.00		97.55	381.90	701.20	1.39	0.89
				100 J/ml mv		0.04	0.07	0.84	2.82	4.73	8.60	12.11	17.01	23.00	29.80	37.04	43.96	50.49	56.86	62.92	68.69	74.00	79.21	83.65	87.21	90.44	92.87	95.34	96.87	98.11	98.66	98.70	98.83	99.11	99.17	99.23	99.31	99.36	100.00		103.37	371.92	700.77	1.34	0.96
				sd		0.02	0.03	0.34	1.24	2.21	3.32	3.51	3.59	3.55	3.36	3.16	3.25	3.13	2.86	2.67	2.79	2.30	1.11	0.97	0.77	0.75	1.20	0.93	0.93	0.82	1.07	1.09	1.00	0.94	0.97	1.02	1.07	1.11	0.00		33.73	19.99	10.82	0.38	0.09
				p-value (100⭤0)		0.417	0.398	0.296	0.224	0.233	0.215	0.276	0.491	0.870	0.724	0.484	0.384	0.306	0.262	0.197	0.177	0.120	0.028	0.024	0.019	0.029	0.056	0.153	0.297	0.439	0.482	0.344	0.299	0.360	0.346	0.372	0.395	0.420	#ZAHL!		0.245	0.338	0.026
			500 J/ml	500 J/ml A		0.07	0.13	1.85	6.40	10.19	15.46	18.95	23.67	29.51	35.96	42.82	49.03	55.16	61.08	67.08	73.43	78.04	82.48	86.25	91.19	94.04	95.22	96.26	97.51	98.19	98.43	98.65	98.89	99.05	99.05	99.05	99.42	99.42	100.00		44.47	340.46	653.92	2.77	1.09
				500 J/ml B		0.17	0.32	4.26	12.89	19.03	25.57	29.01	33.02	37.50	42.81	48.43	54.33	60.20	64.93	69.49	73.61	77.66	81.45	87.00	89.84	94.03	95.12	95.85	96.45	98.35	99.00	100.00	100.00	100.00	100.00	100.00	100.00	100.00	100.00		26.65	303.66	665.47	4.95	1.18
				500 J/ml C		0.28	0.52	6.84	19.88	28.39	36.61	40.61	45.14	50.15	55.53	60.84	66.23	70.65	74.57	78.79	82.27	85.30	87.46	89.84	93.00	96.67	97.34	98.66	99.88	100.00	100.00	100.00	100.00	100.00	100.00	100.00	100.00	100.00	100.00		22.42	208.94	624.76	6.05	1.62
				500 J/ml mv	Pyrochar shows a reduction of mainly the smaller particle fraction indicated by the 10% quantile, which became significant at >10 J/ml and is only broken by one outlier at 100 J/ml. In contrast, the 50% quantile data (median) are insignificant.	0.17	0.32	4.32	13.06	19.20	25.88	29.52	33.94	39.05	44.77	50.70	56.53	62.00	66.86	71.79	76.44	80.33	83.80	87.70	91.34	94.91	95.89	96.92	97.95	98.85	99.14	99.55	99.63	99.68	99.68	99.68	99.81	99.81	100.00		31.18	284.35	648.05	4.59	1.30
				sd		0.11	0.20	2.50	6.74	9.10	10.58	10.84	10.76	10.41	9.93	9.22	8.81	7.90	6.95	6.18	5.05	4.31	3.21	1.89	1.59	1.52	1.25	1.52	1.76	1.00	0.79	0.78	0.64	0.55	0.55	0.55	0.33	0.33	0.00		11.70	67.85	20.98	1.67	0.28
				p-value (500⭤0)		0.074	0.073	0.061	0.044	0.036	0.030	0.033	0.041	0.053	0.071	0.094	0.127	0.155	0.196	0.248	0.279	0.384	0.583	0.492	0.220	0.064	0.446	0.945	0.982	0.872	0.944	0.860	0.898	0.929	0.777	0.671	0.678	0.558	#ZAHL!		0.000	0.151	0.261
		LD-PE	0 J/ml	0 J/ml A		0.00	0.00	0.02	0.12	0.34	0.80	1.37	2.73	6.03	11.69	18.99	27.45	36.81	46.83	55.30	63.94	71.27	78.29	83.06	87.17	89.92	92.09	93.40	94.18	94.82	95.71	96.32	96.46	96.46	96.88	97.39	97.48	97.89	100.00		239.13	431.86	706.66	1.00	1.00
				0 J/ml B		0.00	0.00	0.02	0.12	0.33	0.74	1.30	2.44	4.98	9.85	16.95	24.98	33.91	43.89	53.37	62.22	70.38	77.13	82.94	87.95	91.89	94.47	95.99	96.57	96.95	97.66	97.83	98.10	98.43	98.66	98.73	99.43	99.43	100.00		252.31	442.99	685.32	1.00	1.00
				0 J/ml C		0.00	0.01	0.05	0.27	0.75	1.71	3.03	5.29	9.44	15.53	23.76	31.78	39.82	48.44	56.13	63.73	70.52	76.74	80.66	85.58	88.40	91.08	92.88	93.96	95.33	96.34	96.67	96.78	97.21	97.37	97.37	97.56	97.97	100.00		214.01	424.79	729.78	1.00	1.00
				0 J/ml mv		0.00	0.00	0.03	0.17	0.47	1.08	1.90	3.49	6.82	12.36	19.90	28.07	36.85	46.39	54.93	63.30	70.72	77.39	82.22	86.90	90.07	92.55	94.09	94.90	95.70	96.57	96.94	97.11	97.37	97.64	97.83	98.16	98.43	100.00		235.15	433.21	707.25	1.00	1.00
				sd		0.00	0.01	0.02	0.09	0.24	0.54	0.98	1.57	2.33	2.90	3.50	3.44	2.96	2.31	1.42	0.94	0.48	0.81	1.35	1.21	1.75	1.74	1.67	1.45	1.11	1.00	0.79	0.87	0.99	0.92	0.78	1.10	0.87	0.00		19.46	9.18	22.24	0.00	0.00
			10 J/ml	10 J/ml A		0.00	0.00	0.02	0.12	0.33	0.75	1.33	2.42	4.73	9.71	16.78	24.92	33.40	42.48	50.86	59.66	68.12	75.02	80.51	84.35	87.65	90.55	91.69	93.31	93.67	94.13	94.53	94.79	94.79	95.71	95.71	95.71	95.71	100.00		253.12	453.40	738.51	0.94	0.95
				10 J/ml B		0.00	0.00	0.02	0.10	0.29	0.76	1.37	2.52	4.90	9.53	16.18	24.30	33.13	42.60	52.51	60.98	68.19	75.79	82.31	87.38	91.57	95.25	96.44	97.20	97.80	98.35	98.87	98.87	99.12	99.12	99.12	99.12	100.00	100.00		254.37	447.22	689.62	0.99	0.99
				10 J/ml C		0.00	0.01	0.07	0.33	0.88	1.92	3.40	6.07	10.96	18.62	27.76	37.22	45.42	54.43	62.05	68.20	74.84	79.56	82.79	85.72	88.32	90.17	90.99	90.99	91.43	92.52	93.18	94.57	94.57	95.87	95.87	95.87	95.87	100.00		202.14	396.13	742.63	1.06	1.07
				10 J/ml mv		0.00	0.00	0.04	0.18	0.50	1.14	2.03	3.67	6.86	12.62	20.24	28.81	37.32	46.50	55.14	62.95	70.38	76.79	81.87	85.82	89.18	91.99	93.04	93.83	94.30	95.00	95.53	96.08	96.16	96.90	96.90	96.90	97.19	100.00		236.54	432.25	723.59	1.00	1.01
				sd		0.00	0.01	0.03	0.13	0.33	0.67	1.18	2.08	3.55	5.20	6.52	7.29	7.02	6.86	6.04	4.60	3.86	2.43	1.20	1.52	2.10	2.83	2.97	3.14	3.23	3.01	2.97	2.42	2.57	1.92	1.92	1.92	2.43	0.00		29.80	31.43	29.49	0.06	0.06
				p-value (10⭤0)		#ZAHL!	1.000	0.749	0.888	0.915	0.910	0.888	0.909	0.986	0.943	0.940	0.881	0.920	0.979	0.957	0.903	0.887	0.707	0.754	0.388	0.603	0.786	0.621	0.620	0.517	0.439	0.471	0.524	0.490	0.582	0.481	0.382	0.453	#ZAHL!		0.949	0.962	0.486
			50 J/ml	50 J/ml A		0.00	0.00	0.03	0.17	0.36	0.73	1.22	2.23	5.00	10.62	18.99	28.20	38.54	48.70	57.90	66.46	75.18	80.93	86.21	89.86	92.56	95.15	96.30	97.04	97.75	98.24	98.49	98.94	99.62	99.93	100.00	100.00	100.00	100.00		246.87	422.23	666.00	0.97	1.02
				50 J/ml B		0.00	0.01	0.06	0.29	0.82	1.84	3.25	5.85	10.49	17.75	26.01	35.22	44.35	53.61	62.03	70.58	77.05	83.05	87.58	92.07	93.71	95.21	96.00	96.40	97.82	99.00	99.13	99.13	99.13	99.13	99.13	99.13	100.00	100.00		205.86	400.33	644.85	1.23	1.11
				50 J/ml C		0.00	0.00	0.02	0.10	0.27	0.71	1.28	2.23	4.27	8.55	15.03	22.86	31.78	41.63	51.06	59.88	68.70	75.93	82.79	87.52	91.27	93.95	96.11	97.07	97.67	98.04	98.40	98.91	99.69	99.85	99.85	99.85	100.00	100.00		260.68	453.03	691.13	0.82	0.94
				50 J/ml mv		0.00	0.00	0.04	0.19	0.48	1.09	1.92	3.44	6.59	12.31	20.01	28.76	38.22	47.98	57.00	65.64	73.64	79.97	85.53	89.82	92.51	94.77	96.14	96.84	97.75	98.43	98.67	98.99	99.48	99.64	99.66	99.66	100.00	100.00		237.80	425.20	667.33	1.01	1.02
				sd		0.00	0.01	0.02	0.10	0.30	0.65	1.16	2.09	3.40	4.83	5.56	6.20	6.29	6.02	5.54	5.40	4.38	3.66	2.47	2.28	1.22	0.71	0.15	0.38	0.08	0.51	0.40	0.12	0.31	0.44	0.47	0.47	0.00	0.00		28.51	26.47	23.17	0.20	0.08
				p-value (50⭤0)		#ZAHL!	1.000	0.692	0.834	0.966	0.985	0.986	0.975	0.928	0.988	0.978	0.874	0.749	0.691	0.566	0.500	0.315	0.298	0.111	0.121	0.118	0.110	0.101	0.089	0.034	0.045	0.027	0.021	0.024	0.027	0.025	0.095	0.035	#ZAHL!		0.901	0.646	0.098
			100 J/ml	100 J/ml A		0.00	0.00	0.03	0.14	0.36	0.77	1.28	2.20	4.22	8.38	14.81	22.99	32.33	42.32	52.57	62.47	71.28	78.08	84.36	89.30	92.48	94.32	95.97	96.81	97.75	98.37	98.70	99.32	99.84	100.00	100.00	100.00	100.00	100.00		261.86	447.31	672.88	0.91	0.97
				100 J/ml B		0.00	0.00	0.04	0.20	0.51	1.09	1.70	2.64	4.40	7.72	12.61	19.04	26.44	34.48	43.24	51.49	60.99	69.47	76.25	82.37	85.54	88.09	91.48	93.82	94.51	95.22	95.38	95.99	95.99	96.46	97.07	99.01	99.24	100.00		270.68	491.43	769.56	0.93	0.90
				100 J/ml C		0.00	0.00	0.03	0.14	0.35	0.79	1.33	2.26	4.48	9.05	15.94	23.82	32.56	42.38	51.59	60.61	68.56	75.25	81.24	86.07	89.55	91.95	93.70	95.31	96.41	97.47	97.97	98.66	98.75	99.06	99.06	99.19	99.19	100.00		257.15	450.55	712.86	0.83	0.94
				100 J/ml mv		0.00	0.00	0.03	0.16	0.41	0.88	1.44	2.37	4.37	8.38	14.45	21.95	30.44	39.73	49.13	58.19	66.94	74.27	80.62	85.91	89.19	91.45	93.72	95.31	96.22	97.02	97.35	97.99	98.19	98.51	98.71	99.40	99.48	100.00		263.23	463.10	718.43	0.89	0.94
				sd		0.00	0.00	0.01	0.03	0.09	0.18	0.23	0.24	0.13	0.67	1.69	2.55	3.47	4.54	5.13	5.88	5.33	4.39	4.09	3.47	3.48	3.14	2.25	1.50	1.63	1.62	1.74	1.76	1.98	1.83	1.50	0.53	0.45	0.00		6.87	24.59	48.58	0.05	0.03
				p-value (100⭤0)		#ZAHL!	0.374	0.768	0.862	0.675	0.578	0.470	0.289	0.143	0.082	0.072	0.069	0.072	0.086	0.132	0.211	0.288	0.292	0.554	0.666	0.716	0.626	0.828	0.750	0.670	0.703	0.730	0.483	0.554	0.503	0.417	0.153	0.138	#ZAHL!		0.078	0.120	0.735
			500 J/ml	500 J/ml A		0.00	0.00	0.02	0.12	0.31	0.73	1.25	2.08	3.88	7.57	13.53	21.10	29,6	39.35	49.72	59.00	67.29	74.86	81.60	86.49	90.58	92.65	94.75	96.48	97.48	97.85	98.05	98.39	98.56	98.88	99.01	99.11	99.11	100.00		268.28	458.91	699.22	0.89	0.94
				500 J/ml B		0.00	0.00	0.02	0.10	0.27	0.65	1.13	1.90	3.68	7.37	13.11	20.45	29.10	38.93	49.19	59,1	68.15	75.99	82.05	86.40	90.64	92.38	94.07	94.93	96.13	96.69	97.40	98.50	99.31	99.37	99.83	100.00	100.00	100.00		270.33	460.99	698.85	0.93	0.96
				500 J/ml C		0.00	0.00	0.02	0.11	0.29	0.68	1.17	2.05	4.06	8.48	15.58	23.78	33.02	43.51	53.67	62.91	71.81	78.96	85.03	89.23	92.87	94.98	96.53	97.49	98.01	98.56	98.95	98.99	99.09	99.30	99.37	99.37	99.37	100.00		260.27	442.75	672.59	0.82	0.96
				500 J/ml mv	For LD-PE no significant influence on the particle size was found.	0.00	0.00	0.02	0.11	0.29	0.69	1.18	2.01	3.87	7.81	14.07	21.78	31.06	40.60	50.86	60.96	69.08	76.60	82.89	87.37	91.36	93.34	95.12	96.30	97.21	97.70	98.13	98.63	98.99	99.18	99.40	99.49	99.49	100.00		266.29	454.22	690.22	0.88	0.95
				sd		0.00	0.00	0.00	0.01	0.02	0.04	0.06	0.10	0.19	0.59	1.32	1.77	2.77	2.53	2.45	2.76	2.40	2.12	1.86	1.61	1.31	1.43	1.27	1.29	0.97	0.94	0.78	0.32	0.39	0.27	0.41	0.46	0.46	0.00		5.32	9.98	15.27	0.06	0.01
				p-value (500⭤0)		#ZAHL!	0.374	0.374	0.299	0.257	0.276	0.274	0.179	0.095	0.056	0.054	0.048	0.116	0.043	0.067	0.243	0.310	0.582	0.639	0.704	0.363	0.576	0.444	0.280	0.152	0.227	0.136	0.047	0.058	0.049	0.036	0.125	0.133	#ZAHL!		0.056	0.055	0.336
		LD-PE (weathered)	0 J/ml	0 J/ml A		0.00	0.00	0.03	0.13	0.27	0.57	1.00	2.05	4.65	9.75	16.99	25.72	35.15	44.74	53.85	63.33	71.74	78.83	84.55	88.54	91.46	93.85	96.18	97.40	98.14	98.93	99.31	99.45	99.95	100.00	100.00	100.00	100.00	100.00		252.88	440.23	684.52	1.00	1.00
				0 J/ml B		0.00	0.00	0.03	0.17	0.41	1.02	1.93	3.87	7.57	13.20	20.30	28.77	37.99	47.53	56.44	64.70	72.02	78.73	84.70	88.69	92.21	94.62	96.35	97.40	98.59	98.87	99.55	100.00	100.00	100.00	100.00	100.00	100.00	100.00		228.02	427.86	679.21	1.00	1.00
				0 J/ml C		0.00	0.00	0.03	0.14	0.30	0.60	1.01	1.86	4.09	9.15	16.59	25.74	35.54	45.04	55.00	64.11	71.75	77.79	82.57	86.49	89.64	92.91	94.84	96.22	97.17	97.74	98.21	98.21	98.27	98.33	98.33	98.40	98.40	100.00		256.17	436.96	709.66	1.00	1.00
				0 J/ml mv		0.00	0.00	0.03	0.15	0.33	0.73	1.31	2.59	5.44	10.70	17.96	26.74	36.23	45.77	55.10	64.05	71.84	78.45	83.94	87.91	91.10	93.79	95.79	97.01	97.97	98.51	99.02	99.22	99.41	99.44	99.44	99.47	99.47	100.00		245.69	435.02	691.13	1.00	1.00
				sd		0.00	0.00	0.00	0.02	0.07	0.25	0.53	1.11	1.87	2.19	2.04	1.76	1.54	1.53	1.30	0.69	0.16	0.57	1.19	1.23	1.32	0.86	0.83	0.68	0.73	0.67	0.71	0.92	0.98	0.96	0.96	0.92	0.92	0.00		15.39	6.41	16.27	0.00	0.00
			10 J/ml	10 J/ml A		0.00	0.00	0.03	0.13	0.30	0.67	1.15	2.09	4.10	8.16	14.46	22.23	31.32	40.74	51.26	61.67	70.98	79.73	85.99	90.33	93.13	95.90	97.23	97.91	98.66	99.04	99.30	99.38	99.59	100.00	100.00	100.00	100.00	100.00		263.51	452.73	660.77	0.96	0.97
				10 J/ml B		0.00	0.00	0.02	0.11	0.29	0.68	1.16	2.11	4.42	9.59	17.14	26.03	35.84	45.69	55.31	64.22	72.36	79.92	84.93	88.79	91.65	94.45	96.63	98.12	98.77	98.93	99.00	99.76	100.00	100.00	100.00	100.00	100.00	100.00		253.69	434.88	681.32	0.90	0.98
				10 J/ml C		0.00	0.00	0.02	0.12	0.31	0.74	1.26	2.17	4.13	8.27	14.24	21.70	30.11	38.59	47.82	56.90	65.34	73.22	79.27	83.79	86.93	89.98	92.79	94.97	97.45	98.73	99.09	99.18	99.18	99.32	99.32	99.65	100,00	100,00		263.41	467.55	746.60	0.97	0.93
				10 J/ml mv		0.00	0.00	0.02	0.12	0.30	0.70	1.19	2.12	4.22	8.67	15.28	23.32	32.42	41.67	51.46	60.93	69.56	77.62	83.40	87.64	90.57	93.44	95.55	97.00	98.29	98.90	99.13	99.44	99.59	99.77	99.77	99.88	100.00	100.00		260.20	451.72	696.23	0.94	0.96
				sd		0.00	0.00	0.01	0.01	0.01	0.04	0.06	0.04	0.18	0.80	1.61	2.36	3.02	3.64	3.75	3.72	3.72	3.81	3.61	3.42	3.24	3.09	2.41	1.76	0.73	0.16	0.15	0.29	0.41	0.39	0.39	0.20	0.00	0.00		5.64	16.36	44.82	0.04	0.03
				p-value (10⭤0)		#ZAHL!	#ZAHL!	0.116	0.116	0.568	0.832	0.711	0.504	0.323	0.206	0.149	0.114	0.124	0.147	0.188	0.226	0.349	0.729	0.817	0.904	0.805	0.859	0.878	0.995	0.612	0.386	0.813	0.713	0.781	0.612	0.612	0.488	0.495	#ZAHL!		0.200	0.175	0.862
			50 J/ml	50 J/ml A		0.00	0.00	0.02	0.09	0.23	0.53	0.95	1.76	3.69	7.77	14.16	22.00	31.10	41.17	51.55	61.13	70.11	77.18	83.37	88.22	91.58	94.43	95.97	97.50	98.22	98.50	99.01	99.23	99.34	99.81	100.00	100.00	100.00	100.00		265.86	451.49	685.69	0.95	0.98
				50 J/ml B		0.00	0.00	0.02	0.11	0.25	0.56	0.94	1.64	3.43	7.56	14.10	21.71	30.79	40.37	49.97	59.69	68.60	76.08	82.23	86.85	90.37	92.75	94.69	95.82	96.78	97.38	97.78	98.29	98.51	98.65	98.75	98.81	98.81	100.00		266.85	457.77	700.76	0.85	0.93
				50 J/ml C		0.00	0.00	0.02	0.09	0.23	0.53	0.91	1.62	3.57	7.90	14.90	23.57	33.04	43.30	53.19	63.26	72.36	79.82	85.32	89.76	92.63	94.87	95.90	96.58	97.32	97.51	97.71	98.20	98.42	98.57	98.57	98.57	98.71	100.00		263.82	444.35	667.37	0.97	0.98
				50 J/ml mv		0.00	0.00	0.02	0.10	0.24	0.54	0.93	1.67	3.56	7.74	14.39	22.43	31.64	41.61	51.57	61.36	70.36	77.69	83.64	88.28	91.53	94.02	95.52	96.63	97.44	97.80	98.17	98.57	98.76	99.01	99.11	99.13	99.17	100.00		265.51	451.20	684.61	0.93	0.96
				sd		0.00	0.00	0.00	0.01	0.01	0.02	0.02	0.08	0.13	0.17	0.45	1.00	1.22	1.51	1.61	1.80	1.89	1.92	1.56	1.46	1.13	1.12	0.72	0.84	0.73	0.61	0.73	0.57	0.51	0.69	0.78	0.77	0.72	0.00		1.55	6.71	16.72	0.06	0.03
				p-value (50⭤0)		#ZAHL!	#ZAHL!	0.000	0.022	0.105	0.262	0.286	0.225	0.158	0.080	0.041	0.021	0.016	0.029	0.042	0.073	0.248	0.549	0.804	0.754	0.695	0.797	0.692	0.582	0.425	0.243	0.220	0.358	0.367	0.562	0.663	0.649	0.686	#ZAHL!		0.091	0.039	0.653
			100 J/ml	100 J/ml A		0.00	0.00	0.04	0.21	0.47	1.00	1.67	2.86	5.60	10.74	17.76	25.70	34.47	43.92	53.67	61.98	69.17	75.72	81.67	85.44	89.12	91.92	94.54	95.52	96.15	97.34	97.79	98.29	98.62	98.71	98.93	99.06	99.36	100.00		245.49	442.13	718.13	1.03	1.00
				100 J/ml B		0.00	0.00	0.03	0.16	0.36	0.75	1.22	2.14	4.19	8,4	15.30	23.49	32.59	42.64	52.72	62.05	70.63	78.16	84.13	88.80	91.97	94.15	95,9	96.61	97.35	98,1	98.61	98.90	99.17	99.63	99.69	99.69	99.69	100.00		260.73	446.52	679.45	0.87	0.96
				100 J/ml C		0.00	0.00	0.03	0.14	0.33	0.75	1.25	2.15	4.50	9.43	16.85	25.05	34.41	44.63	54.25	63.61	72.28	79.55	85.18	89.49	92.59	94.92	96.58	97.37	97.76	98.34	98.91	99.10	99.17	99.63	99.65	100.00	100.00	100.00		254.60	439.45	670.61	1.01	0.99
				100 J/ml mv		0.00	0.00	0.03	0.17	0.39	0.83	1.38	2.38	4.76	10.09	16.64	24.75	33.82	43.73	53.55	62.55	70.69	77.81	83.66	87.91	91.23	93.66	95.56	96.50	97.09	97.84	98.44	98.76	98.99	99.32	99.42	99.58	99.68	100.00		253.61	442.70	689.40	0.97	0.98
				sd		0.00	0.00	0.01	0.04	0.07	0.14	0.25	0.41	0.74	0.93	1.24	1.14	1.07	1.01	0.77	0.92	1.56	1.94	1.80	2.17	1.85	1.56	1.44	0.93	0.84	0.71	0.58	0.42	0.32	0.53	0.43	0.48	0.32	0.00		7.67	3.57	25.27	0.08	0.02
				p-value (100⭤0)		#ZAHL!	#ZAHL!	0.374	0.387	0.375	0.571	0.854	0.774	0.593	0.742	0.391	0.173	0.090	0.126	0.150	0.087	0.274	0.613	0.833	0.998	0.930	0.905	0.829	0.489	0.241	0.359	0.331	0.477	0.521	0.859	0.975	0.855	0.721	#ZAHL!		0.470	0.144	0.925
			500 J/ml	500 J/ml A		0.00	0.00	0.04	0.18	0.38	0.82	1.39	2.29	4.41	8.62	15.20	23.20	31.98	41.24	50.54	59.76	69.22	77.06	83.30	88.00	91.44	94.52	96.71	97.66	98.41	98.58	98.78	98.95	99.18	99.53	99.73	99.80	99.80	100.00		260.10	455.26	687.83	0.97	0.97
				500 J/ml B		0.00	0.00	0.03	0.13	0.31	0.71	1.22	2.09	4.10	8.30	14.79	22.84	31.70	40.73	50.05	58.98	67.72	75.60	82.28	87.52	90.33	93.13	94.69	95.67	96.72	97.54	97.76	98.26	98.39	98.45	98.52	98.52	98.52	100.00		262.24	457.45	700.31	0.87	0.94
				500 J/ml C		0.00	0.00	0.03	0.13	0.30	0.66	1.09	1.88	3.71	7.72	13.97	21.72	30.18	39.17	48.79	58.02	66.57	74.27	80.55	85.50	89.74	92.25	94.03	95.62	96.83	97.85	98.31	98.35	98.93	98.97	99.19	99.19	99.56	100.00		266.49	463.07	709.34	0.96	0.94
				500 J/ml mv	For weathered LD-PE no significant influence on the particle size was found.	0.00	0.00	0.03	0.15	0.33	0.73	1.23	2.09	4.07	8.21	14.65	22.59	31.29	40.38	49.79	58.92	67.84	75.64	82.04	87.01	90.50	93.30	95.14	96.32	97.32	97.99	98.28	98.52	98.83	98.98	99.15	99.17	99.29	100.00		262.94	458.59	699.16	0.93	0.95
				sd		0.00	0.00	0.01	0.03	0.04	0.08	0.15	0.21	0.35	0.46	0.63	0.77	0.97	1.08	0.90	0.87	1.33	1.40	1.39	1.33	0.86	1.14	1.40	1.16	0.95	0.53	0.51	0.38	0.40	0.54	0.61	0.64	0.68	0.00		3.25	4.03	10.80	0.06	0.02
				p-value (500⭤0)		#ZAHL!	#ZAHL!	0.374	1.000	0.949	1.000	0.815	0.480	0.282	0.126	0.055	0.020	0.009	0.008	0.004	0.001	0.007	0.032	0.147	0.437	0.546	0.582	0.528	0.426	0.401	0.350	0.218	0.288	0.404	0.511	0.675	0.671	0.806	#ZAHL!		0.130	0.006	0.516
		PET	0 J/ml	0 J/ml A		0.00	0.00	0.04	0.13	0.32	1.43	3.46	7.11	12.55	20.14	30.14	40.93	52.70	64.63	75.57	84.10	89.47	93.27	96.38	97.69	98.26	98.52	98.79	98.79	98.79	98.88	98.88	98.88	98.88	98.88	98.88	98.88	98.88	100.00		190.86	365.70	545.94	1.00	1.00
				0 J/ml B		0.00	0.00	0.05	0.14	0.31	1.11	2.55	5.47	10.42	17.77	27.72	39.12	51.76	64.70	76.14	84.52	89.83	94.10	96.30	97.36	97.90	98.33	98.71	98.82	99.27	99.27	99.32	99.32	99.32	99.32	99.32	99.32	99.32	100.00		206.72	369.42	541.81	1.00	1.00
				0 J/ml C		0.00	0.00	0.04	0.12	0.28	1.26	3.26	7.65	14.37	23.55	34.54	46.16	58.18	69.61	79.60	88.38	93.71	96.40	97.90	98.61	98.97	99.11	99.38	99.84	99.84	99.89	99.94	100.00	100.00	100.00	100.00	100.00	100.00	100.00		183.40	347.10	511.45	1.00	1.00
				0 J/ml mv		0.00	0.00	0.04	0.13	0.30	1.27	3.09	6.74	12.45	20.49	30.80	42.07	54.21	66.31	77.10	85.67	91.00	94.59	96.86	97.89	98.38	98.65	98.96	99.15	99.30	99.35	99.38	99.40	99.40	99.40	99.40	99.40	99.40	100.00		193.66	360.74	533.07	1.00	1.00
				sd		0.00	0.00	0.01	0.01	0.02	0.16	0.48	1.14	1.98	2.91	3.46	3.66	3.47	2.86	2.18	2.36	2.35	1.62	0.90	0.65	0.54	0.41	0.37	0.60	0.53	0.51	0.53	0.56	0.56	0.56	0.56	0.56	0.56	0.00		11.91	11.96	18.83	0.00	0.00
			10 J/ml	10 J/ml A		0.00	0.00	0.03	0.10	0.24	1.19	3.21	7.45	14.28	23.31	34.38	45.70	57.57	68.75	78.24	85.72	90.66	94.24	96.83	98.28	98.64	99.27	99.44	99.62	99.62	99.91	99.91	100.00	100.00	100.00	100.00	100.00	100.00	100.00		184.37	348.88	534.65	1.04	1.05
				10 J/ml B		0.00	0.00	0.05	0.16	0.38	1.55	3.98	9.59	18.04	29.08	41.58	52.69	64.27	74.42	84.21	91.18	94.88	97.59	98.87	99.42	99.92	100.00	100.00	100.00	100.00	100.00	100.00	100.00	100.00	100.00	100.00	100.00	100.00	100.00		170.96	323.95	491.91	1.21	1.14
				10 J/ml C		0.00	0.00	0.03	0.09	0.23	1.14	3.05	7.23	14.29	23.20	34.35	46.26	58.22	69.44	78.15	85.22	89.85	93.41	96.18	96.95	97.67	97.80	97.80	98.42	98.51	98.51	98.99	98.99	98.99	99.12	99.12	99.12	99.12	100.00		185.13	346.84	541.85	0.99	1.00
				10 J/ml mv		0.00	0.00	0.04	0.12	0.28	1.29	3.41	8.09	15.54	25.20	36.77	48.22	60.02	70.87	80.20	87.37	91.80	95.08	97.29	98.22	98.74	99.02	99.08	99.35	99.38	99.47	99.63	99.66	99.66	99.71	99.71	99.71	99.71	100.00		180.15	339.89	522.80	1.08	1.06
				sd		0.00	0.00	0.01	0.04	0.08	0.22	0.50	1.30	2.17	3.36	4.17	3.88	3.69	3.09	3.47	3.31	2.70	2.21	1.40	1.24	1.13	1.12	1.14	0.82	0.77	0.84	0.56	0.58	0.58	0.51	0.51	0.51	0.51	0.00		7.97	13.84	27.00	0.12	0.07
				p-value (10⭤0)		#ZAHL!	#ZAHL!	0.422	0.587	0.709	0.875	0.462	0.249	0.142	0.140	0.129	0.117	0.118	0.134	0.261	0.507	0.721	0.772	0.676	0.703	0.639	0.619	0.871	0.755	0.894	0.834	0.600	0.604	0.604	0.523	0.523	0.523	0.523	#ZAHL!		0.178	0.120	0.618
			50 J/ml	50 J/ml A		0.00	0.00	0.06	0.19	0.41	1.69	4.10	8.85	16.16	25.63	36.63	48.26	58.99	70.49	79.96	87.14	91.73	95.68	97.77	98.52	98.98	99.25	99.97	100.00	100.00	100.00	100.00	100.00	100.00	100.00	100.00	100.00	100.00	100.00		175.43	340.61	524.58	1.09	1.07
				50 J/ml B		0.00	0.00	0.05	0.16	0.37	1.60	3.74	8.35	15.63	25.18	36.87	48.22	60.34	71.74	81.01	88.23	92.59	95.48	97.21	98.33	99.09	99.42	99.84	99.88	100.00	100.00	100.00	100.00	100.00	100.00	100.00	100.00	100.00	100.00		178.31	340.00	515.61	1.16	1.09
				50 J/ml C		0.00	0.00	0.03	0.10	0.25	1.31	3.43	7.51	13.79	22.45	33.52	44.58	55.86	67.68	78.22	86.02	91.26	94.01	95.74	96.70	97.73	98.27	98.86	99.04	99.21	99.49	99.61	99.61	99.61	99.74	99.74	99.74	99.74	100.00		185.32	353.74	530.26	0.99	0.98
				50 J/ml mv		0.00	0.00	0.05	0.15	0.34	1.53	3.76	8.24	15.19	24.42	35.67	47.02	58.40	69.97	79.73	87.13	91.86	95.06	96.91	97.85	98.60	98.98	99.56	99.64	99.74	99.83	99.87	99.87	99.87	99.91	99.91	99.91	99.91	100.00		179.69	344.78	523.48	1.08	1.05
				sd		0.00	0.00	0.02	0.05	0.08	0.20	0.34	0.68	1.24	1.72	1.87	2.11	2.30	2.08	1.41	1.11	0.67	0.91	1.05	1.00	0.76	0.62	0.61	0.52	0.46	0.29	0.23	0.23	0.23	0.15	0.15	0.15	0.15	0.00		5.09	7.76	7.39	0.09	0.06
				p-value (50⭤0)		#ZAHL!	#ZAHL!	0.742	0.501	0.465	0.144	0.119	0.122	0.111	0.114	0.098	0.112	0.156	0.147	0.155	0.386	0.577	0.686	0.956	0.960	0.699	0.488	0.218	0.345	0.338	0.228	0.216	0.251	0.251	0.202	0.202	0.202	0.202	#ZAHL!		0.135	0.125	0.458
			100 J/ml	100 J/ml A		0.00	0.00	0.03	0.10	0.24	1.23	3.33	7.79	15.28	25.52	37.64	48.70	59.64	71.01	80.09	88.54	92.32	96.22	98.14	99.26	99.60	100.00	100.00	100.00	100.00	100.00	100.00	100.00	100.00	100.00	100.00	100.00	100.00	100.00		181.12	338.85	514.81	1.05	1.08
				100 J/ml B		0.00	0.00	0.04	0.14	0.35	1.65	3.85	8.42	15.81	25.53	36.46	47.87	59.47	71.20	80.58	88.35	92.66	95.72	97.83	98.69	99.69	99.71	99.80	99.80	99.92	100.00	100.00	100.00	100.00	100.00	100.00	100.00	100.00	100.00		177.77	341.52	514.71	1.16	1.08
				100 J/ml C		0.00	0.00	0.03	0.10	0.24	1.18	3.09	7.49	14.92	24.74	36.23	47.61	58.93	70.14	79.87	86.81	91.00	93.88	97.06	98.25	98.69	99.57	100.00	100.00	100.00	100.00	100.00	100.00	100.00	100.00	100.00	100.00	100.00	100.00		128.89	342.63	530.33	1.42	1.01
				100 J/ml mv		0.00	0.00	0.03	0.11	0.28	1.35	3.42	7.90	15.34	25.26	36.78	48.06	59.35	70.78	80.18	87.90	91.99	95.27	97.68	98.73	99.33	99.76	99.93	99.93	99.97	100.00	100.00	100.00	100.00	100.00	100.00	100.00	100.00	100.00		162.59	341.00	519.95	1.21	1.06
				sd		0.00	0.00	0.01	0.02	0.06	0.26	0.39	0.47	0.45	0.45	0.76	0.57	0.37	0.57	0.36	0.95	0.88	1.23	0.56	0.51	0.55	0.22	0.12	0.12	0.05	0.00	0.00	0.00	0.00	0.00	0.00	0.00	0.00	0.00		29.24	1.94	8.99	0.19	0.04
				p-value (100⭤0)		#ZAHL!	#ZAHL!	0.101	0.315	0.528	0.647	0.402	0.179	0.069	0.048	0.043	0.049	0.063	0.056	0.074	0.203	0.532	0.592	0.253	0.149	0.101	0.014	0.012	0.090	0.092	0.090	0.114	0.139	0.139	0.139	0.139	0.139	0.139	#ZAHL!		0.163	0.048	0.338
			500 J/ml	500 J/ml A		0.00	0.00	0.03	0.11	0.25	1.15	3.00	6.92	13.15	22.01	33.53	44.71	56.36	68.25	77.49	84.47	90.16	93.48	96.35	97.01	97.21	97.58	97.64	97.68	97.68	98.07	98.07	98.07	98.07	98.07	98.62	98.62	98.86	100.00		189.35	352.65	538.97	1.01	1.04
				500 J/ml B		0.00	0.00	0.06	0.21	0.47	1.80	4.07	8.55	15.64	25.40	36.81	48.35	59.78	70.49	80.05	87.66	92.44	95.06	97.16	98.35	98.98	99.25	99.66	99.70	99.97	100.00	100.00	100.00	100.00	100.00	100.00	100.00	100.00	100.00		177.39	339.88	519.11	1.17	1.09
				500 J/ml C		0.00	0.00	0.04	0.15	0.33	1.45	3.72	8.63	15.92	25.47	36.89	47.93	59.10	70.92	80.42	87.41	92.64	95.71	97.78	98.57	99.59	99.64	99.70	99.73	99.73	99.73	99.73	99.85	99.85	99.85	100.00	100.00	100.00	100.00		176.69	341.58	519.34	1.04	1.02
				500 J/ml mv	For PET no significant influence on the particle size was found.	0.00	0.00	0.04	0.16	0.35	1.47	3.60	8.03	14.90	24.29	35.74	47.00	58.41	69.89	79.32	86.51	91.75	94.75	97.10	97.98	98.59	98.82	99.00	99.04	99.13	99.27	99.27	99.31	99.31	99.31	99.54	99.54	99.62	100.00		181.14	344.70	525.81	1.07	1.05
				sd		0.00	0.00	0.02	0.05	0.11	0.33	0.55	0.97	1.52	1.98	1.92	1.99	1.81	1.43	1.60	1.77	1.38	1.15	0.72	0.84	1.24	1.09	1.18	1.18	1.26	1.05	1.05	1.07	1.07	1.07	0.80	0.80	0.66	0.00		7.12	6.93	11.40	0.08	0.04
				p-value (500⭤0)		#ZAHL!	#ZAHL!	1.000	0.419	0.515	0.393	0.293	0.208	0.164	0.134	0.096	0.110	0.136	0.125	0.228	0.645	0.661	0.896	0.740	0.891	0.795	0.813	0.958	0.889	0.837	0.911	0.875	0.900	0.900	0.900	0.816	0.816	0.683	#ZAHL!		0.193	0.115	0.598
		PET (weathered)	0 J/ml	0 J/ml A		0.00	0.00	0.06	0.18	0.39	1.49	3.96	9.78	18.59	29.70	42.03	53.41	64.04	73.83	81.17	87.25	91.19	94.13	95.68	97.12	97.73	98.08	99.03	99.22	99.32	99.32	99.51	99.51	99.51	99.68	99.68	99.68	99.68	100.00		170.00	321.57	527.65	1.00	1.00
				0 J/ml B		0.00	0.00	0.03	0.08	0.19	1.01	3.00	8.20	16.63	27.74	40.57	52.39	63.41	73.81	82.52	89.17	93.79	96.09	97.75	98.98	99.56	99.84	99.84	100.00	100.00	100.00	100.00	100.00	100.00	100.00	100.00	100.00	100.00	100.00		177.77	325.60	506.28	1.00	1.00
				0 J/ml C		0.00	0.00	0.05	0.17	0.37	1.60	4.21	10.15	19.22	30.42	43.00	54.77	65.17	75.55	83.04	88.85	92.39	95.77	97.54	98.94	99.06	99.31	99.37	99.43	99.67	99.90	100.00	100.00	100.00	100.00	100.00	100.00	100.00	100.00		167.91	317.22	512.31	1.00	1.00
				0 J/ml		0.00	0.00	0.05	0.14	0.32	1.37	3.72	9.38	18.15	29.29	41.87	53.52	64.21	74.40	82.24	88.42	92.46	95.33	96.99	98.35	98.78	99.08	99.41	99.55	99.66	99.74	99.84	99.84	99.84	99.89	99.89	99.89	99.89	100.00		171.89	321.46	515.41	1.00	1.00
				sd		0.00	0.00	0.02	0.06	0.11	0.31	0.64	1.04	1.35	1.39	1.22	1.19	0.89	1.00	0.97	1.03	1.30	1.05	1.14	1.06	0.95	0.90	0.41	0.40	0.34	0.37	0.28	0.28	0.28	0.18	0.18	0.18	0.18	0.00		5.20	4.19	11.02	0.00	0.00
			10 J/ml	10 J/ml A		0.00	0.00	0.05	0.15	0.30	1.19	3.32	8.36	16.28	26.37	38.65	50.16	61.29	71.21	80.22	87.37	91.66	94.47	95.97	97.02	97.43	97.55	98.01	98.01	98.01	98.01	98.01	98.01	98.01	98.01	98.12	98.12	98.12	100.00		177.51	333.36	524.14	0.96	0.96
				10 J/ml B		0.00	0.00	0.03	0.09	0.22	1.06	2.96	7.55	15.15	25.31	36.85	48.30	59.29	70.78	80.30	87.36	91.71	94.99	96.93	98.10	98.83	99.53	99.98	100.00	100.00	100.00	100.00	100.00	100.00	100.00	100.00	100.00	100.00	100.00		182.25	340.32	523.93	0.98	0.96
				10 J/ml C		0.00	0.00	0.04	0.14	0.33	1.48	3.98	9.55	18.25	28.78	40.98	52.58	63.31	73.92	81.73	88.59	92.67	95.15	97.16	98.65	99.72	100.00	100.00	100.00	100.00	100.00	100.00	100.00	100.00	100.00	100.00	100.00	100.00	100.00		199.55	324.75	513.15	0.84	0.98
				10 J/ml		0.00	0.00	0.04	0.13	0.28	1.24	3.42	8.49	16.56	26.82	38.83	50.35	61.30	71.97	80.75	87.77	92.01	94.87	96.69	97.92	98.66	99.03	99.33	99.34	99.34	99.34	99.34	99.34	99.34	99.34	99.37	99.37	99.37	100.00		186.44	332.81	520.41	0.92	0.97
				sd		0.00	0.00	0.01	0.03	0.06	0.22	0.52	1.01	1.57	1.78	2.07	2.15	2.01	1.70	0.85	0.71	0.57	0.36	0.63	0.83	1.15	1.30	1.14	1.15	1.15	1.15	1.15	1.15	1.15	1.15	1.09	1.09	1.09	0.00		11.60	7.80	6.29	0.07	0.01
				p-value (10⭤0)		#ZAHL!	#ZAHL!	0.561	0.674	0.666	0.604	0.557	0.346	0.255	0.131	0.094	0.089	0.084	0.100	0.115	0.418	0.617	0.513	0.707	0.615	0.893	0.959	0.911	0.777	0.661	0.594	0.505	0.505	0.505	0.454	0.459	0.459	0.459	#ZAHL!		0.119	0.091	0.533
			50 J/ml	50 J/ml A		0.00	0.00	0.06	0.19	0.40	1.59	3.99	9.33	17.38	28.10	40.46	51.81	63.48	74.14	83.48	90.78	94.82	96.96	98.43	99.05	99.50	100.00	100.00	100.00	100.00	100.00	100.00	100.00	100.00	100.00	100.00	100.00	100.00	100.00		172.41	327.34	494.50	0.99	0.98
				50 J/ml B		0.00	0.00	0.04	0.13	0.34	1.78	4.66	10.56	19.58	30.68	43.27	55.06	66.06	76.58	84.61	89.98	93.58	96.59	98.46	99.34	99.50	100.00	100.00	100.00	100.00	100.00	100.00	100.00	100.00	100.00	100.00	100.00	100.00	100.00		165.03	316.23	499.15	1.08	1.03
				50 J/ml C		0.00	0.00	0.08	0.24	0.44	1.21	3.03	7.69	15.62	26.10	38.59	50.99	63.59	75.11	83.92	90.06	94.68	97.10	98.25	98.70	98.76	98.98	98.98	99.05	99.05	99.31	99.41	99.41	99.55	99.55	99.55	99.74	100.00	100.00		180.97	330.63	498.47	0.93	0.96
				50 J/ml		0.00	0.00	0.06	0.19	0.39	1.53	3.89	9.19	17.53	28.29	40.77	52.62	64.38	75.28	84.00	90.27	94.36	96.88	98.38	99.03	99.25	99.66	99.66	99.68	99.68	99.77	99.80	99.80	99.85	99.85	99.85	99.91	100.00	100.00		172.80	324.73	497.37	1.00	0.99
				sd		0.00	0.00	0.02	0.06	0.05	0.29	0.82	1.44	1.98	2.30	2.36	2.15	1.46	1.23	0.57	0.44	0.68	0.26	0.11	0.32	0.43	0.59	0.59	0.55	0.55	0.40	0.34	0.34	0.26	0.26	0.26	0.15	0.00	0.00		7.98	7.55	2.51	0.08	0.04
				p-value (50⭤0)		#ZAHL!	#ZAHL!	0.411	0.390	0.334	0.552	0.791	0.867	0.678	0.556	0.515	0.560	0.872	0.390	0.053	0.046	0.088	0.068	0.103	0.346	0.477	0.402	0.583	0.752	0.960	0.928	0.903	0.903	0.955	0.825	0.825	0.891	0.374	#ZAHL!		0.877	0.548	0.051
			100 J/ml	100 J/ml A		0.00	0.00	0.04	0.12	0.27	1.17	3.14	7.57	14.56	24.04	35.09	46.79	57.75	68.63	77.70	85.64	90.19	93.73	95.50	96.13	97.02	97.64	98.14	98.16	98.45	98.98	99.21	99.21	99.38	99.71	99.87	99.87	100.00	100.00		183.30	346.01	538.41	0.93	0.93
				100 J/ml B		0.00	0.00	0.03	0.09	0.20	1.03	2.95	7.59	15.33	25.85	38.81	50.46	61.39	71.93	81.43	89.11	93.27	95.56	97.81	98.65	99.13	99.82	99.94	100.00	100.00	100.00	100.00	100.00	100.00	100.00	100.00	100.00	100.00	100.00		181.83	332.32	507.75	0.98	0.98
				100 J/ml C		0.00	0.00	0.04	0.14	0.30	1.22	3.14	7.54	14.71	24.53	36.63	47.71	58.71	68.99	77.38	84.80	90.66	94.82	96.52	97.68	98.06	98.96	99.31	99.31	99.50	99.92	99.92	99.92	100.00	100.00	100.00	100.00	100.00	100.00		183.09	342.52	535.47	0.92	0.93
				100 J/ml		0.00	0.00	0.04	0.12	0.26	1.14	3.08	7.57	14.87	24.81	36.84	48.32	59.28	69.85	78.84	86.52	91.37	94.70	96.61	97.49	98.07	98.81	99.13	99.16	99.32	99.63	99.71	99.71	99.79	99.90	99.96	99.96	100.00	100.00		182.74	340.28	527.21	0.94	0.95
				sd		0.00	0.00	0.01	0.03	0.05	0.10	0.11	0.03	0.41	0.94	1.87	1.91	1.89	1.81	2.25	2.28	1.66	0.92	1.16	1.27	1.06	1.10	0.91	0.93	0.79	0.57	0.43	0.43	0.36	0.17	0.08	0.08	0.00	0.00		0.80	7.11	16.92	0.03	0.03
				p-value (100⭤0)		#ZAHL!	#ZAHL!	0.349	0.488	0.441	0.298	0.159	0.039	0.016	0.010	0.018	0.016	0.015	0.019	0.074	0.258	0.424	0.481	0.706	0.419	0.432	0.759	0.649	0.538	0.524	0.798	0.694	0.694	0.877	0.948	0.612	0.612	0.374	#ZAHL!		0.023	0.017	0.369
			500 J/ml	500 J/ml A		0.00	0.00	0.06	0.19	0.36	1.48	3.88	9.02	17.09	27.48	39.24	50.68	63.05	72.89	81.44	88.06	92.37	95.39	97.60	99.10	99.66	99.81	99.81	100.00	100.00	100.00	100.00	100.00	100.00	100.00	100.00	100.00	100.00	100.00		173.97	331.50	517.47	0.98	0.97
				500 J/ml B		0.00	0.00	0.06	0.16	0.32	1.39	3.95	9.61	18.45	29.60	41.95	53.28	65.50	75.72	84.20	90.31	94.07	96.13	98.35	99.10	99.29	99.29	99.52	99.52	99.52	100.00	100.00	100.00	100.00	100.00	100.00	100.00	100.00	100.00		170.80	321.99	496.78	1.04	1.01
				500 J/ml C		0.00	0.00	0.04	0.14	0.31	1.32	3.30	7.71	14.82	24.37	35.88	47.89	60.13	71.38	80.88	88.32	92.92	95.73	97.85	98.75	99.23	99.46	99.53	99.53	99.57	99.57	99.61	99.71	99.71	99.71	99.71	99.71	99.71	100.00		128.24	341.03	513.93	1.31	0.93
				500 J/ml	For weathered PET no significant influence on the particle size was found.	0.00	0.00	0.05	0.16	0.33	1.40	3.71	8.78	16.79	27.15	39.02	50.62	62.89	73.33	82.17	88.90	93.12	95.75	97.93	98.98	99.39	99.52	99.62	99.68	99.70	99.86	99.87	99.90	99.90	99.90	99.90	99.90	99.90	100.00		157.67	331.51	509.39	1.11	0.97
				sd		0.00	0.00	0.01	0.03	0.03	0.08	0.36	0.97	1.83	2.63	3.04	2.70	2.69	2.20	1.78	1.23	0.87	0.37	0.38	0.20	0.23	0.27	0.16	0.27	0.26	0.25	0.23	0.17	0.17	0.17	0.17	0.17	0.17	0.00		25.54	9.52	11.07	0.18	0.04
				p-value (500⭤0)		#ZAHL!	#ZAHL!	0.579	0.598	0.848	0.880	0.976	0.507	0.359	0.281	0.207	0.163	0.467	0.488	0.955	0.636	0.503	0.550	0.246	0.366	0.339	0.460	0.460	0.661	0.900	0.672	0.881	0.743	0.743	0.948	0.948	0.948	0.948	#ZAHL!		0.398	0.170	0.541
		PBAT	0 J/ml	0 J/ml A		0.00	0.00	0.02	0.07	0.16	0.67	1.52	2.86	4.83	7.92	12.86	19.00	26.31	35.20	45.13	55.16	64.14	71.87	78.88	83.59	87.62	90.35	92.53	93.73	95.62	97.36	98.01	99.00	99.12	99.26	99.46	99.46	99.46	100.00		268.83	477.68	741.02	1.00	1.00
				0 J/ml B		0.00	0.00	0.01	0.05	0.12	0.57	1.36	2.68	5.06	9.25	15.17	22.08	30.25	39.35	49.45	59.53	68.27	76.23	82.78	87.74	90.57	93.06	94.39	95.88	97.04	97.37	97.91	98.03	98.39	98.53	98.69	98.85	99.62	100.00		256.67	459.91	696.80	1.00	1.00
				0 J/ml C		0.00	0.00	0.03	0.07	0.16	0.57	1.14	2.14	4.19	8.19	14.11	21.54	30.33	40.03	50.68	60.61	69.75	77.23	83.41	87.98	91.33	93.89	95.03	96.53	97.62	98.33	98.73	98.98	99.09	99.43	99.51	99.51	99.81	100.00		264.07	455.01	688.76	1.00	1.00
				0 J/ml mv		0.00	0.00	0.02	0.06	0.15	0.60	1.34	2.56	4.69	8.45	14.05	20.87	28.96	38.19	48.42	58.43	67.39	75.11	81.69	86.44	89.84	92.43	93.98	95.38	96.76	97.69	98.22	98.67	98.87	99.07	99.22	99.27	99.63	100.00		263.19	464.20	708.86	1.00	1.00
				sd		0.00	0.00	0.01	0.01	0.02	0.06	0.19	0.37	0.45	0.70	1.16	1.64	2.30	2.61	2.91	2.89	2.91	2.85	2.45	2.47	1.96	1.85	1.30	1.47	1.03	0.56	0.45	0.55	0.41	0.48	0.46	0.37	0.18	0.00		6.13	11.93	28.14	0.00	0.00
			10 J/ml	10 J/ml A		0.00	0.00	0.03	0.08	0.17	0.70	1.52	2.93	5.47	10.08	16.71	24.76	33.98	43.82	53.80	63.81	72.76	79.92	85.44	89.23	92.13	94.79	96.46	97.62	98.65	98.87	98.95	99.18	99.18	99.18	99.18	99.54	99.76	100.00		250.72	441.97	674.81	1.07	1.08
				10 J/ml B		0.00	0.00	0.02	0.06	0.15	0.67	1.58	3.00	5.55	9.72	15.90	23.10	31.44	41.29	50.90	60.80	69.36	77.42	84.24	88.54	91.08	92.76	94.13	95.26	95.87	96.84	97.13	97.60	97.87	98.33	98.82	99.21	99.21	100.00		253.32	453.79	687.59	1.01	1.01
				10 J/ml C		0.00	0.00	0.02	0.08	0.19	0.93	2.27	4.38	7.85	13.80	21.99	30.66	39.73	49.77	59.54	69.57	77.94	84.86	90.08	93.64	96.17	97.47	98.54	99.23	99.48	99.83	99.83	99.83	100.00	100.00	100.00	100.00	100.00	100.00		225.10	417.38	622.00	1.17	1.09
				10 J/ml mv		0.00	0.00	0.02	0.07	0.17	0.77	1.79	3.44	6.29	11.20	18.20	26.17	35.05	44.96	54.75	64.73	73.35	80.73	86.59	90.47	93.13	95.01	96.38	97.37	98.00	98.51	98.64	98.87	99.02	99.17	99.33	99.58	99.66	100.00		243.05	437.71	661.47	1.09	1.06
				sd		0.00	0.00	0.01	0.01	0.02	0.14	0.42	0.82	1.35	2.26	3.31	3.97	4.25	4.35	4.40	4.46	4.32	3.79	3.08	2.77	2.69	2.36	2.21	2.00	1.89	1.53	1.38	1.15	1.07	0.84	0.60	0.40	0.41	0.00		15.60	18.57	34.77	0.08	0.04
				p-value (10⭤0)		#ZAHL!	#ZAHL!	0.643	0.349	0.256	0.139	0.164	0.167	0.124	0.115	0.109	0.100	0.094	0.082	0.106	0.109	0.118	0.109	0.098	0.133	0.162	0.212	0.181	0.236	0.375	0.428	0.642	0.799	0.832	0.870	0.809	0.377	0.922	#ZAHL!		0.106	0.106	0.140
			50 J/ml	50 J/ml A		0.00	0.00	0.02	0.08	0.17	0.75	1.89	3.81	6.94	12.06	19.55	28.15	36.96	46.25	56.07	66.94	76.46	83.16	88.83	91.51	93.49	95.78	96.84	97.71	98.44	98.82	99.31	99.61	99.88	99.88	99.88	100.00	100.00	100.00		234.82	432.15	640.61	1.14	1.11
				50 J/ml B		0.00	0.00	0.02	0.07	0.15	0.66	1.68	3.54	6.60	11.63	18.43	26.03	34.37	43.91	53.90	64.23	72.38	79.54	85.07	88.38	90.46	91.94	93.15	94.25	95.01	95.28	95.28	95.36	95.44	96.42	97.00	97.94	98.23	100.00		238.07	441.54	696.02	1.08	1.04
				50 J/ml C		0.00	0.00	0.01	0.05	0.13	0.62	1.51	3.08	5.75	10.40	17.00	24.47	32.78	42.27	51.50	62.54	70.99	77.96	83.45	87.87	90.69	93.10	94.38	95.41	97.06	97.27	97.71	97.87	98.60	98.92	99.19	99.60	100.00	100.00		247.88	450.96	695.06	1.07	1.01
				50 J/ml mv		0.00	0.00	0.02	0.07	0.15	0.68	1.69	3.48	6.43	11.36	18.33	26.22	34.70	44.14	53.82	64.57	73.28	80.22	85.78	89.25	91.55	93.61	94.79	95.79	96.84	97.12	97.43	97.61	97.97	98.41	98.69	99.18	99.41	100.00		240.26	441.55	677.23	1.10	1.05
				sd		0.00	0.00	0.01	0.02	0.02	0.07	0.19	0.37	0.61	0.86	1.28	1.85	2.11	2.00	2.29	2.22	2.84	2.67	2.76	1.97	1.69	1.97	1.88	1.76	1.73	1.77	2.03	2.14	2.29	1.79	1.50	1.09	1.02	0.00		6.80	9.41	31.72	0.04	0.05
				p-value (50⭤0)		#ZAHL!	#ZAHL!	0.643	0.778	0.859	0.223	0.086	0.039	0.017	0.011	0.013	0.020	0.033	0.035	0.065	0.043	0.066	0.086	0.127	0.197	0.317	0.494	0.574	0.772	0.950	0.628	0.549	0.454	0.542	0.566	0.591	0.895	0.732	#ZAHL!		0.012	0.061	0.266
			100 J/ml	100 J/ml A		0.00	0.00	0.01	0.05	0.13	0.63	1.52	3.06	5.53	9.80	16.21	23.54	31.91	41.63	52.03	62.70	72.16	79.70	84.75	88.74	91.89	94.05	95.51	96.39	97.23	97.65	98.10	99.08	99.16	99.33	99.48	99.82	99.82	100.00		252.75	449.61	680.36	1.06	1.06
				100 J/ml B		0.00	0.00	0.01	0.05	0.14	0.68	1.68	3.42	6.22	10.75	17.04	23.93	31.86	40.79	50.19	59.61	68.15	74.74	80.48	84.62	87.46	89.24	90.92	92.79	94.01	94.54	94.86	95.27	95.42	95.84	96.11	96.81	97.02	100.00		244.61	456.82	764.99	1.05	1.01
				100 J/ml C		0.00	0.00	0.01	0.06	0.18	1.02	2.34	4.27	6.91	10.81	16.68	23.22	30.80	40.33	49.41	59.34	67.66	75.31	80.79	85.81	88.98	90.80	92.01	94.10	95.35	95.97	96.68	97.87	98.49	98.72	98.79	98.92	99.35	100.00		242.89	460.10	728.21	1.09	0.99
				100 J/ml mv		0.00	0.00	0.01	0.05	0.15	0.78	1.85	3.58	6.22	10.45	16.64	23.56	31.52	40.92	50.54	60.55	69.32	76.58	82.01	86.39	89.44	91.36	92.81	94.43	95.53	96.05	96.55	97.41	97.69	97.96	98.13	98.52	98.73	100.00		246.75	455.51	724.52	1.07	1.02
				sd		0.00	0.00	0.00	0.01	0.03	0.21	0.43	0.62	0.69	0.57	0.42	0.36	0.63	0.66	1.35	1.87	2.47	2.71	2.38	2.12	2.25	2.45	2.40	1.82	1.62	1.56	1.62	1.95	1.99	1.86	1.78	1.55	1.50	0.00		5.27	5.37	42.44	0.02	0.04
				p-value (100⭤0)		#ZAHL!	#ZAHL!	0.000	0.002	0.017	0.818	0.251	0.249	0.533	0.859	0.334	0.037	0.008	0.007	0.013	0.038	0.153	0.309	0.277	0.344	0.333	0.181	0.112	0.083	0.076	0.066	0.073	0.218	0.252	0.289	0.323	0.412	0.509	#ZAHL!		0.916	0.013	0.272
			500 J/ml	500 J/ml A		0.00	0.00	0.02	0.06	0.17	0.84	2.03	3.84	6.64	11.57	18.76	26.44	34.85	44.46	54.17	63.32	72.20	78.75	83.46	87.42	89.08	91.30	93.78	95.58	96.18	96.41	96.66	96.89	97.28	97.43	97.96	98.84	99.20	100.00		238.34	439.95	722.22	1.13	1.09
				500 J/ml B		0.00	0.00	0.01	0.05	0.14	0.75	1.77	3.43	6.28	10.88	17.33	24.52	32.59	41.95	51.03	61.04	69.47	76.57	81.86	85.82	88.54	90.41	91.39	92.38	92.80	93.39	94.13	94.50	95.03	95.29	95.62	96.43	96.53	100.00		243.53	452.98	737.23	1.05	1.02
				500 J/ml C		0.00	0.00	0.02	0.07	0.20	1.03	2.34	4.26	6.75	10.53	16.11	22.48	30.66	39.83	48.64	58.06	68.24	75.66	81.83	86.05	89.79	92.54	94.22	95.86	96.79	97.78	97.95	98.40	99.03	99.42	99.42	99.42	99.42	100.00		245.69	463.60	708.20	1.07	0.98
				500 J/ml mv	PBAT shows a significant comminution at 50 J/ml by the 10% quantile, but it falls out of line and is nearly marginal.	0.00	0.00	0.02	0.06	0.17	0.87	2.05	3.84	6.56	10.99	17.40	24.48	32.70	42.08	51.28	60.81	69.97	76.99	82.38	86.43	89.14	91.42	93.13	94.61	95.26	95.86	96.25	96.60	97.11	97.38	97.67	98.23	98.38	100.00		242.52	452.18	722.55	1.09	1.03
				sd		0.00	0.00	0.01	0.01	0.03	0.14	0.29	0.42	0.25	0.53	1.33	1.98	2.10	2.32	2.77	2.64	2.03	1.59	0.93	0.87	0.63	1.07	1.52	1.93	2.15	2.25	1.94	1.97	2.01	2.07	1.92	1.59	1.61	0.00		3.78	11.85	14.52	0.04	0.05
				p-value (500⭤0)		#ZAHL!	#ZAHL!	0.643	0.725	0.346	0.039	0.023	0.016	0.003	0.007	0.030	0.072	0.106	0.126	0.286	0.352	0.275	0.374	0.671	0.997	0.586	0.456	0.501	0.610	0.336	0.243	0.162	0.154	0.212	0.239	0.244	0.329	0.253	#ZAHL!		0.008	0.283	0.496
		PBAT (weathered)	0 J/ml	0 J/ml A		0.00	0.00	0.02	0.07	0.20	0.96	2.17	4.13	7.65	13.89	22.60	31.85	41.39	50.87	59.73	68.82	76.36	82.44	86.59	89.51	91.56	93.04	93.57	94.02	94.98	95.24	95.24	95.24	95.47	95.53	95.53	95.53	95.78	100.00		225.74	412.61	673.71	1.00	1.00
				0 J/ml B		0.00	0.00	0.02	0.07	0.19	0.94	2.23	4.25	7.48	13.27	21.08	29.67	39.45	49.38	59.42	68.78	76.04	82.09	87.03	89.93	92.17	93.36	94.58	95.57	96.04	96.11	96.16	96.20	96.26	96.83	96.83	96.83	96.83	100.00		228.18	418.97	665.15	1.00	1.00
				0 J/ml C		0.00	0.00	0.02	0.08	0.23	1.23	2.88	5.37	9.10	14.85	22.93	31.94	41.32	51.59	61.15	70.72	78.29	84.66	89.26	92.19	94.22	95.61	96.72	97.79	98.78	99.30	99.65	99.71	99.76	99.76	100.00	100.00	100.00	100.00		216.68	410.03	632.99	1.00	1.00
				0 J/ml mv		0.00	0.00	0.02	0.07	0.21	1.04	2.43	4.58	8.08	14.00	22.20	31.15	40.72	50.61	60.10	69.44	76.90	83.06	87.63	90.54	92.65	94.00	94.96	95.79	96.60	96.88	97.02	97.05	97.16	97.37	97.45	97.45	97.54	100.00		223.53	413.87	657.28	1.00	1.00
				sd		0.00	0.00	0.00	0.01	0.02	0.16	0.39	0.68	0.89	0.80	0.99	1.29	1.10	1.13	0.92	1.11	1.22	1.39	1.43	1.44	1.39	1.40	1.61	1.89	1.96	2.14	2.33	2.35	2.28	2.17	2.30	2.30	2.20	0.00		6.06	4.60	21.47	0.00	0.00
			10 J/ml	10 J/ml A		0.00	0.00	0.01	0.05	0.17	0.94	2.41	4.91	8.43	14.01	21.89	29.99	38.28	48.18	57.53	66.55	74.54	80.55	85.49	89.07	91.47	93.75	94.66	95.75	96.74	96.82	96.99	97.56	97.61	98.03	98.03	98.13	99.05	100.00		221.83	424.45	679.85	1.02	0.97
				10 J/ml B		0.00	0.00	0.02	0.08	0.22	1.19	2.74	5.08	8.45	14.24	22.13	30.50	39.25	49.18	59.08	68.45	76.23	82.15	86.97	90.68	93.38	95.07	96.42	97.24	97.80	98.60	99.03	99.03	99.16	99.34	99.34	99.34	100.00	100.00		221.25	419.82	656.28	1.03	1.00
				10 J/ml C		0.00	0.00	0.01	0.06	0.16	0.78	1.93	3.82	6.94	12.33	20.02	28.49	38.23	48.11	57.28	66.50	74.33	81.61	86.99	90.18	92.45	94.20	94.88	96.18	97.64	98.02	98.45	98.65	99.31	99.39	99.39	99.39	99.69	100.00		233.60	424.90	661.56	0.93	0.97
				10 J/ml mv		0.00	0.00	0.01	0.06	0.18	0.97	2.36	4.60	7.94	13.53	21.35	29.66	38.59	48.49	57.96	67.17	75.03	81.44	86.48	89.98	92.43	94.34	95.32	96.39	97.39	97.81	98.16	98.41	98.69	98.92	98.92	98.95	99.58	100.00		225.56	423.06	665.90	0.99	0.98
				sd		0.00	0.00	0.01	0.02	0.03	0.21	0.41	0.68	0.87	1.04	1.16	1.04	0.58	0.60	0.98	1.11	1.04	0.81	0.86	0.82	0.96	0.67	0.96	0.77	0.57	0.91	1.05	0.76	0.94	0.77	0.77	0.71	0.48	0.00		6.97	2.81	12.37	0.06	0.02
				p-value (10⭤0)		#ZAHL!	#ZAHL!	0.116	0.349	0.351	0.654	0.848	0.973	0.858	0.563	0.384	0.193	0.041	0.045	0.051	0.066	0.114	0.156	0.301	0.586	0.835	0.726	0.754	0.640	0.538	0.526	0.482	0.394	0.344	0.309	0.354	0.341	0.191	#ZAHL!		0.723	0.042	0.580
			50 J/ml	50 J/ml A		0.00	0.00	0.01	0.07	0.19	0.95	2.17	4.24	7.95	14.76	23.61	32.54	42.30	52.96	61.56	70.53	78.70	84.22	88.35	91.99	93.75	95.58	96.63	96.99	98.13	98.21	98.69	99.37	99.44	99.44	99.44	99.54	99.54	100.00		222.60	404.97	641.31	1.01	1.02
				50 J/ml B		0.00	0.00	0.02	0.07	0.21	1.06	2.40	4.41	7.95	13.80	21.72	30.04	39.05	49.21	58.79	68.46	76.55	83.13	87.86	90.98	93.36	95.33	96.39	97.69	98.47	98.65	98.71	98.77	99.41	100.00	100.00	100.00	100.00	100.00		224.68	419.82	650.95	1.02	1.00
				50 J/ml C		0.00	0.00	0.02	0.08	0.21	1.01	2.25	4.19	7.57	13.09	20.87	29.23	38.90	49.36	58.66	67.80	75.79	82.37	87.47	91.29	94.19	95.62	96.43	97.89	98.95	99.64	99.76	99.76	99.91	100.00	100.00	100.00	100.00	100.00		228.37	419.25	649.90	0.95	0.98
				50 J/ml mv		0.00	0.00	0.02	0.07	0.20	1.01	2.27	4.28	7.82	13.88	22.07	30.60	40.08	50.51	59.67	68.93	77.01	83.24	87.89	91.42	93.77	95.51	96.48	97.52	98.52	98.83	99.05	99.30	99.59	99.81	99.81	99.85	99.85	100.00		225.22	414.68	647.39	0.99	1.00
				sd		0.00	0.00	0.01	0.01	0.01	0.06	0.12	0.12	0.22	0.84	1.40	1.73	1.92	2.12	1.64	1.42	1.51	0.93	0.44	0.52	0.42	0.16	0.13	0.47	0.41	0.73	0.61	0.50	0.28	0.32	0.32	0.27	0.27	0.00		2.92	8.41	5.29	0.04	0.02
				p-value (50⭤0)		#ZAHL!	#ZAHL!	0.374	1.000	0.820	0.729	0.553	0.491	0.657	0.866	0.897	0.681	0.645	0.944	0.712	0.650	0.922	0.864	0.773	0.378	0.254	0.138	0.177	0.200	0.173	0.209	0.216	0.181	0.142	0.126	0.153	0.148	0.145	#ZAHL!		0.687	0.891	0.481
			100 J/ml	100 J/ml A		0.00	0.00	0.02	0.07	0.17	0.86	2.00	4.00	7.97	14.82	24.07	32.92	43.30	53.88	63.41	72.29	79.83	85.49	89.65	93.34	95.48	96.53	96.97	97.51	98.27	98.40	98.60	99.05	99.16	99.87	100.00	100.00	100.00	100.00		222.40	401.28	626.55	1.02	1.03
				100 J/ml B		0.00	0.00	0.02	0.07	0.19	0.99	2.27	4.38	8.44	15.82	26.05	35.79	46.46	56.47	65.46	74.73	81.48	86.19	90.09	92.54	95.27	96.63	97.12	97.90	98.24	98.53	99.06	99.61	99.68	99.73	100.00	100.00	100.00	100.00		218.91	389.76	621.69	1.04	1.07
				100 J/ml C		0.00	0.00	0.02	0.07	0.21	1.06	2.41	4.68	8.54	15.34	24.55	33.85	44.09	54.11	63.38	73.14	80.22	86.22	90.48	93.25	95.43	97.17	98.26	98.82	98.97	98.97	99.02	99.02	99.45	100.00	100.00	100.00	100.00	100.00		219.07	399.50	617.94	0.99	1.03
				100 J/ml mv		0.00	0.00	0.02	0.07	0.19	0.97	2.23	4.35	8.32	15.33	24.89	34.19	44.62	54.82	64.08	73.39	80.51	85.97	90.07	93.04	95.39	96.78	97.45	98.08	98.49	98.63	98.89	99.23	99.43	99.87	100.00	100.00	100.00	100.00		220.13	396.85	622.06	1.02	1.04
				sd		0.00	0.00	0.00	0.00	0.02	0.10	0.21	0.34	0.30	0.50	1.03	1.46	1.64	1.43	1.19	1.24	0.86	0.41	0.42	0.44	0.11	0.34	0.71	0.67	0.41	0.30	0.25	0.33	0.26	0.14	0.00	0.00	0.00	0.00		1.97	6.20	4.32	0.03	0.03
				p-value (100⭤0)		#ZAHL!	#ZAHL!	1.000	0.374	0.374	0.543	0.480	0.630	0.681	0.071	0.031	0.054	0.027	0.016	0.010	0.015	0.014	0.026	0.047	0.045	0.027	0.029	0.070	0.121	0.177	0.233	0.237	0.188	0.163	0.118	0.128	0.128	0.124	#ZAHL!		0.407	0.019	0.050
			500 J/ml	500 J/ml A		0.00	0.00	0.02	0.06	0.17	0.82	2.01	3.89	7.16	12.78	20.98	29.81	39.61	49.99	59.19	67.80	75.65	82.28	88.01	90.77	93.78	95.00	96.60	97.73	98.54	98.63	99.30	99.64	99.71	99.83	99.91	100.00	100.00	100.00		231.07	416.46	652.32	0.98	0.99
				500 J/ml B		0.00	0.00	0.01	0.05	0.14	0.70	1.81	3.88	8.16	15.23	25.00	35.09	45.70	56.38	65.64	74.30	81.59	86.52	89.83	91.84	93.25	94.56	95.43	96.39	97.05	97.89	98.06	98.92	99.27	99.27	99.27	99.27	99.73	100.00		220.96	391.77	626.18	1.03	1.07
				500 J/ml C		0.00	0.00	0.02	0.07	0.17	0.76	1.88	3.99	7.99	14.95	24.23	33.42	42.98	52.32	61.08	70.29	77.83	83.18	88.98	92.44	94.83	96.69	98.53	99.04	99.29	99.65	99.85	100.00	100.00	100.00	100.00	100.00	100.00	100.00		222.11	406.18	634.80	0.98	1.01
				500 J/ml mv	For weathered PBAT no significant influence on the particle size was found.	0.00	0.00	0.02	0.06	0.16	0.76	1.90	3.92	7.77	14.32	23.40	32.77	42.76	52.90	61.97	70.80	78.36	83.99	88.94	91.68	93.95	95.42	96.85	97.72	98.29	98.72	99.07	99.52	99.66	99.70	99.73	99.76	99.91	100.00		224.71	404.80	637.77	1.00	1.02
				sd		0.00	0.00	0.01	0.01	0.02	0.06	0.10	0.06	0.54	1.34	2.13	2.70	3.05	3.23	3.32	3.28	3.00	2.23	0.91	0.85	0.80	1.12	1.57	1.33	1.14	0.88	0.92	0.55	0.37	0.38	0.40	0.42	0.16	0.00		5.53	12.40	13.32	0.03	0.04
				p-value (500⭤0)		#ZAHL!	#ZAHL!	0.374	0.116	0.041	0.047	0.088	0.170	0.636	0.743	0.427	0.401	0.336	0.312	0.400	0.535	0.479	0.574	0.251	0.303	0.233	0.245	0.217	0.222	0.266	0.240	0.228	0.151	0.135	0.141	0.167	0.163	0.135	#ZAHL!		0.816	0.301	0.252

## Sheet: Comminution factors
				size distribution								comminution factor
				10% quantile				50% quantile				10% quantile				50% quantile
		POM type	J/ml	mv		sd		mv		sd		mv		sd		mv		sd
		farm oPOM	0	82.90	±	9.46		561.33	±	72.98		1.00	±	0.00		1.00	±	0.00
			10	N/A				N/A				N/A				N/A
			50	72.31	±	15.39		401.40	±	47.86		1.17	±	0.15		1.17	±	0.34
			100	53.40	±	2.61		344.64	±	33.40		1.56	±	0.26		1.56	±	0.23
			500	47.21	±	2.46		331.88	±	69.03		1.76	±	0.21		1.76	±	0.23
		forest oPOM	0	108.08	±	17.40		476.26	±	79.01		1.00	±	0.00		1.00	±	0.00
			10	91.71	±	11.04		422.27	±	68.13		1.19	±	0.27		1.17	±	0.36
			50	84.92	±	16.97		485.08	±	41.44		1.28	±	0.09		0.98	±	0.14
			100	60.48	±	16.40		233.11	±	58.78		1.87	±	0.55		2.18	±	0.80
			500	55.49	±	13.01		244.41	±	70.33		1.98	±	0.28		2.02	±	0.48
		pyrochar	0	130.33	±	6.33		355.79	±	16.19		1.00	±	0.00		1.00	±	0.00
			10	119.09	±	16.07		369.18	±	39.01		1.10	±	0.11		0.97	±	0.15
			50	81.39	±	10.07		333.41	±	9.59		1.62	±	0.25		1.07	±	0.08
			100	103.37	±	33.73		371.92	±	19.99		1.34	±	0.38		0.96	±	0.09
			500	31.18	±	11.70		284.35	±	67.85		4.59	±	1.67		1.30	±	0.28
		LD-PE	0	235.15	±	19.46		433.21	±	9.18		1.00	±	0.00		1.00	±	0.00
			10	236.54	±	29.80		432.25	±	31.43		1.00	±	0.06		1.01	±	0.06
			50	237.80	±	28.51		425.20	±	26.47		1.01	±	0.20		1.02	±	0.08
			100	263.23	±	6.87		463.10	±	24.59		0.89	±	0.05		0.94	±	0.03
			500	266.29	±	5.32		454.22	±	9.98		0.88	±	0.06		0.95	±	0.01
		LD-PE (w)	0	245.69	±	15.39		435.02	±	6.41		1.00	±	0.00		1.00	±	0.00
			10	260.20	±	5.64		451.72	±	16.36		0.94	±	0.04		0.96	±	0.03
			50	265.51	±	1.55		451.20	±	6.71		0.93	±	0.06		0.96	±	0.03
			100	253.61	±	7.67		442.70	±	3.57		0.97	±	0.08		0.98	±	0.02
			500	262.94	±	3.25		458.59	±	4.03		0.93	±	0.06		0.95	±	0.02
		PET	0	193.66	±	11.91		360.74	±	11.96		1.00	±	0.00		1.00	±	0.00
			10	180.15	±	7.97		339.89	±	13.84		1.08	±	0.12		1.06	±	0.07
			50	179.69	±	5.09		344.78	±	7.76		1.08	±	0.09		1.05	±	0.06
			100	162.59	±	29.24		341.00	±	1.94		1.21	±	0.19		1.06	±	0.04
			500	181.14	±	7.12		344.70	±	6.93		1.07	±	0.08		1.05	±	0.04
		PET (w)	0	171.89	±	5.20		321.46	±	4.19		1.00	±	0.00		1.00	±	0.00
			10	186.44	±	11.60		332.81	±	7.80		0.92	±	0.07		0.97	±	0.01
			50	172.80	±	7.98		324.73	±	7.55		1.00	±	0.08		0.99	±	0.04
			100	182.74	±	0.80		340.28	±	7.11		0.94	±	0.03		0.95	±	0.03
			500	157.67	±	25.54		331.51	±	9.52		1.11	±	0.18		0.97	±	0.04
		PBAT	0	263.19	±	6.13		464.20	±	11.93		1.00	±	0.00		1.00	±	0.00
			10	243.05	±	15.60		437.71	±	18.57		1.09	±	0.08		1.06	±	0.04
			50	240.26	±	6.80		441.55	±	9.41		1.10	±	0.04		1.05	±	0.05
			100	246.75	±	5.27		455.51	±	5.37		1.07	±	0.02		1.02	±	0.04
			500	242.52	±	3.78		452.18	±	11.85		1.09	±	0.04		1.03	±	0.05
		PBAT (w)	0	223.53	±	6.06		413.87	±	4.60		1.00	±	0.00		1.00	±	0.00
			10	225.56	±	6.97		423.06	±	2.81		0.99	±	0.06		0.98	±	0.02
			50	225.22	±	2.92		414.68	±	8.41		0.99	±	0.04		1.00	±	0.02
			100	220.13	±	1.97		396.85	±	6.20		1.02	±	0.03		1.04	±	0.03
			500	224.71	±	5.53		404.80	±	12.40		1.00	±	0.03		1.02	±	0.04
